# Supplementary material for: Low FoxO expression in Drosophila somatosensory neurons protects dendrite growth under nutrient restriction
Source: eLife. 2020 May 19;9:e53351. doi: 10.7554/eLife.53351 (PMC7308081; doi:10.7554/eLife.53351)
Supplement: Figure 1—source data 1. [file elife-53351-fig1-data1.xlsx]

## Sheet: fig 1-C-F; sup 2-G H
Condition	Hours	Segment Width	epidermal cell width	Dendrite length	Dendrite density	Body length		Condition	Hours	Segment Width	epidermal cell width	Dendrite length	Dendrite density	Body length
HY	48	182.5	14.874	4997.42	118.34			LY	48	113.12	8.963	2399.16	126.165
HY	48	173.28	13.654	4381	109.75			LY	48	105.85	8.328	2186.27	125.536
HY	48	173.79	14.603	5001.96	113.527			LY	48	128.33	9.333	2535.96	133.517
HY	48	197.78	13.561	4453.88	112.633			LY	48	134.19	10.057	2747.46	140.731
HY	48	196	13.354	4601.84	108.602			LY	48	107.26		2039.55	148.267
HY	48	199.65	15.094	4577.05	106.346			LY	48	105.88		1946.56	161.182
HY	48	167.33	14.181	5230.98	111.954			LY	48	121.36	8.955	3137.94	158.936	1625.05
HY	48	141.44	9.526	4344.29	132.903			LY	48	137.31	11.065	3097.28	133.057	1703.14
HY	48	164.15	10.829	4296.74	112.313	1976.26		LY	48	145.54	10.415	3083.35	142.279	1829.98
HY	48	148.43	11.335	4307.52	128.261	1976.26		LY	72	216.31	16.432	7620.75	122.851
HY	48	134.39	9.73	2695.15	107.077	1844.89		LY	72	212.13	16.288	7644.87	120.697
HY	48	129.71	9.866	3102.02	103.151	1844.89		LY	72	182.42	13.148	4818.92	136.576
HY	72	363.05	27.241	10179.6	68.5052			LY	72	167.39	11.471	4160.2	131.415
HY	72	333.35	26.668	11277.3	73.4607			LY	72	161.76	11.258	3737.96	118.399
HY	72	347.35	25.396	9765.56	67.2829			LY	72	179.4	12.884	4542.38	124.76
HY	72	341.08	27.676	11521.6	76.9344			LY	72	170.57	14.163	4157.05	125.535
HY	72	339.31	26.485	11335.2	75.7994			LY	72	161.28	13.551	4244.7	136.569	2028.82
HY	72	355.64	27.967	9859.25	66.9968			LY	72	187.04	13.883	4255.42	134.259	2028.82
HY	72	338.94	24.221	10398.5	80.5739			LY	72	147.47	10.479	4390.22	172.209	1695.34
HY	72	339.91	26.216	8358.12	59.3249			LY	72	163.18	13.191	4578.33	138.883	2274.89
HY	72	359	26.773	10990.3	69.7125			LY	72	175.94	13.418	4847.29	128.271	2274.89
HY	72	307.17	23.551	10344.2	84.8305			LY	96	244.73	17.801	7720.25	100.334
HY	72	333.76	23.951	11033.3	85.2498			LY	96	259.03	18.719	7036.12	100.524
HY	72	379.13	27.518	11649.9	71.0939			LY	96	226.27	17.217	6941.77	107.795
HY	72	316.38	26.679	9900.72	66.7743			LY	96	238.46	19.48	7215.85	111.081
HY	72	338.71	25.253	9315.26	67.728	3855.7		LY	96	207.55	16.15	6824.86	119.92
HY	72	335.75	28.596	9939.34	69.5285	3855.7		LY	96	210.27	16.234	6789.15	118.16
HY	72	339.45	25.564	11279.9	80.6007	3762.73		LY	96	242.82	19.796	8149.24	101.305
HY	72	345.24	27.448	8728.24	69.0975	3762.73		LY	96	253.03	20.495	6626.96	100.73
HY	72	398.53	32.245	10871.3	59.9955	4571.71		LY	96	239.4	19.3	7891.66	106.268
HY	72	402.19	33.154	10930.7	59.3333	4571.71		LY	96	247.4	19.217	6778.86	105.621
HY	96	540.43	43.005	16960.1	51.0014			LY	96	277.29	21.801	7595.84	97.5237	3134.28
HY	96	593.2	46.819	16231.2	43.9463			LY	96	288.9	22.985	8725.42	97.4038	3134.28
HY	96	537.94	38.593	14105.6	45.5585			LY	96	239.4	18.132	6899.78	102.318	2887.92
HY	96	558.74	40.661	14549.1	43.626			LY	96	253.58	18.089	7291.23	109.547	2887.92
HY	96	581.26	43.696	16265.3	44.0009			LY	120	328.57	24.865	10735.5	98.7878
HY	96	603.37	45.64	14910.4	39.126			LY	120	309.12	22.931	11168	108.888
HY	96	511.51	37.529	14377	55.6093			LY	120	308.43	23.271	11132.4	105.361
HY	96	569.51	44.764	16418.6	44.0007			LY	120	328.06	28.539	11135.6	83.9976
HY	96	597.01	46.955	18133	44.8917			LY	120	341.58	28.417	11451.8	91.3607	4048.31
HY	96	542.05	39.95	12559	37.8724			LY	120	327.71	27.215	10359.2	92.8041
HY	96	516.36	35.07	15644.5	53.7964			LY	120	321.8	30.27	9108.36	91.1195
HY	96	538.08	39.918	14412.8	49.4296			LY	120	311.13	24.598	9477.91	89.5338
HY	96	547.73	44.885	13639.4	45.6114			LY	120	289.98	23.341	8783.07	82.1819
HY	96	536.4	43.476	15968.8	45.3922	6030.41		LY	120	279.34	20.364	9647.18	94.8422
HY	96	642.43	48.871	17449.9	46.881	6746.79		LY	120	341.58	25.836	11186.2	91.7948
HY	96	558.09	41.995	14524	46.3699	5941.72		LY	120	319.03	27.852	12671.4	117.724	3466.68
HY	120	617.54	43.031	17689.4	40.0333			LY	144	321.54	24.782	11577.1	95.2361
HY	120	625	47.956	17250.5	41.3185			LY	144	372.29	30.789	12211	91.1866
HY	120	565.91	37.651	18369.9	51.5073			LY	144	348.34	27.996	11180.1	88.1855
HY	120	550.76	44.819	18178.9	46.7178			LY	144	335.59	26.668	12072.9	95.2731
HY	120	581.82	50.24	17546.1	42.2962			LY	144	395.39	31.108	12669.8	81.8546
HY	120	559.19	38.309	16003.4	48.5667			LY	144	380.05	29.763	12625.9	85.1278
HY	120	535.62	40.272	19697.4	49.4813			LY	144	393.28	30.337	11905.8	76.4205
HY	120	603.03	48.581	18801.2	40.8533			LY	144	406.78	28.634	12935.7	79.8765	4479.91
HY	120	651.56	46.313	16592.1	37.9136			LY	144	421.15	29.742	14222.3	80.6222	4479.91
HY	120	518.19	36.894	15464.3	45.7131			LY	144	349.66	25.924	11195.9	97.6305	3815.28
HY	120	522.75	38.159	19001.2	51.365			LY	144	348.19	27.218	10589.6	88.5104	3815.28
HY	120	556.09	40.861	17577.8	53.6268			LY	144	308.64	24.734	11397.5	115.387	3623.49
HY	120	531.82	37.518	16963.6	49.758			LY	168	331.79	24.621	11137.2	87.1503
HY	120	597.99	48.78	17241.6	47.2788	6067.47		LY	168	348.05	23.794	10985.4	96.9204
HY	120	613.13	52.193	18029	42.4133	6392.7		LY	168	344.23	28.789	11461.4	92.3986
HY	120	644.45	51.257	17523.1	41.5092	6392.7		LY	168	329.98	23.616	12344.2	104.052
								LY	168	335.41	26.355	11501.5	96.2649
								LY	168	393.24	28.648	13994.1	95.1383
								LY	168	327.81	30.205	10498.7	96.9343	4213.65
								LY	168	370.32	27.659	12206.7	88.265	4435.31
								LY	168	405.64	30.641	12245.2	81.2369	4435.31
								LY	168	366.74	28.052	11735.9	95.3216	4290.32
								LY	168	362.43	28.04	13623.7	94.4012	4290.32
								LY	168	352.31	26.47	13578.4	108.49	4311.01
								LY	168	348.72	26.638	12384.7	117.215	4311.01
								LY	192	389.04	34.204	14997.2	95.4329
								LY	192	388.38	25.916	11665.6	73.4406
								LY	192	399.93	31.576	13830.5	84.9572
								LY	192	433.02	33.458	15541.4	88.4107
								LY	192	412.83	29.984	13997	90.1672
								LY	192	439.18	34.66	14169.4	77.4447	5004.48
								LY	192	386.58	27.537	15394.8	84.1696	4860.58
								LY	192	487.27	38.323	17777.6	77.1114	5558.76
								LY	216	580.35	43.674	21736.3	64.153
								LY	216	607.68	43.713	21528.7	69.3088
								LY	216	541.69	39.621	20871	68.0405
								LY	216	512.92	39.14	18752.3	65.2392
								LY	216	510.61	34.594	17587.4	64.3761
								LY	216	457.63	34.561	17242.4	67.7467
								LY	216	470.46	35.433	17260	67.2278
								LY	216	504.63	42.717	22371.8	79.7071
								LY	216	497.73	34.601	18789.8	68.3496
								LY	216	506.82	37.288	20196.9	73.3172
								LY	216	474.82	34.003	17476.7	80.1456	5141.3
								LY	216	532.35	42.502	18750	74.3487	5462.93
								LY	216	458.64	33.896	15068.2	75.5053	4964.07
								LY	240	532.58	40.121	21155.9	72.4243
								LY	240	533.37	39.81	20239.6	64.7979
								LY	240	574.33	42.728	23797.2	70.3108
								LY	240	519.78	44.452	23549.3	79.4235
								LY	240	503.7	37.175	16204.8	69.3066
								LY	240	531.85	39.345	19415.5	67.9504
								LY	240	474.75	38.54	14482.4	72.5192	5683.02
								LY	240	514.14	44.894	17874.4	70.9492	5683.02
								LY	240	619.21	49.9	22725.1	57.6123	6905.17
								LY	264	506.56	46.038	20131.7	75.0107
								LY	264	624.6	45.932	23962	64.9089
								LY	264	613.64	43.617	25649.7	62.8917
								LY	264	596.21	43.756	26930.4	73.2367
								LY	264	620.48	47.42	26137.6	69.6791
								LY	264	534.85	44.025	23863.7	81.1972
								LY	264	523.49	46.742	21641.7	78.6481
								LY	264	558.5	43.412	25241.1	72.0251
								LY	264	550.83	42.844	25179.7	71.4752
								LY	264	597.73	42.809	24979.8	63.1827
								LY	264	587.88	51.287	25661.3	65.1714	6466.41
								LY	264	619.21	53.656	24405.6	63.5204	6466.41
								LY	264	588.89	48.858	25538.1	73.506	5844.4

## Sheet: sup1-A-C
condition	BranchNumber	TerminalNumber	AveTermLength		condition	BranchNumber	TerminalNumber	AveTermLength
LY	726	635	12.2994		HY	513	474	16.8941
LY	816	737	14.1127		HY	503	454	17.4563
LY	772	686	13.7307		HY	575	513	16.2748
LY	875	809	12.6152		HY	524	460	16.9982
LY	775	730	14.1233		HY	465	445	18.3082
LY	931	841	12.005		HY	520	453	15.3064
LY	983	860	12.426		HY	447	417	18.6558
LY	930	847	12.2336		HY	545	538	15.5838
LY	824	732	12.4118		HY	611	532	17.1746
LY	976	844	11.64		HY	491	486	14.9697
LY	849	766	13.4317		HY	512	461	15.6631
LY	858	734	13.4981		HY	631	542	15.8525
LY	802	712	14.4674		HY	577	503	17.0584
					HY	554	476	15.2733
mean	855.154	764.077	12.9996		HY	583	518	15.4053
SE	80.67	70.5342	0.929288		HY	477	426	18.2912
n	13	13	13
					mean	533	481.125	16.5729
					SE	52.5255	39.4274	1.20014
					n	16	16	16

## Sheet: sup 3-A B
condition	normalized dendrite length	segment width		condition	normalized dendrite length	segment width		condition	normalized dendrite length		condition	normalized dendrite length	segment width		condition	normalized dendrite length	segment width
84h in HY	29.8505	363.13		96h in HY	31.3825	540.43		108h in HY	29.9892		84h in HY + 12h starvation	29.9547	419.21		84h in HY + 24h starvation	34.6786	419.25
84h in HY	32.2061	381.09		96h in HY	27.362	593.2		108h in HY	26.838		84h in HY + 12h starvation	29.5571	426.58		84h in HY + 24h starvation	33.5787	410.42
84h in HY	33.7633	372.73		96h in HY	26.2214	537.94		108h in HY	32.3106		84h in HY + 12h starvation	31.4668	356.92		84h in HY + 24h starvation	33.3356	389.93
84h in HY	27.8231	418.96		96h in HY	26.0391	558.74		108h in HY	26.6356		84h in HY + 12h starvation	26.654	361.43		84h in HY + 24h starvation	34.8951	423.5
84h in HY	28.6566	393.21		96h in HY	27.9828	581.26		108h in HY	28.4424		84h in HY + 12h starvation	30.1109	400.76		84h in HY + 24h starvation	33.4127	366.72
84h in HY	35.0261	346.97		96h in HY	24.7119	603.37		108h in HY	31.8062		84h in HY + 12h starvation	33.5532	367.43		84h in HY + 24h starvation	37.5052	386.16
84h in HY	31.0096	384.1		96h in HY	28.107	511.51		108h in HY	26.7909		84h in HY + 12h starvation	32.7983	384.09		84h in HY + 24h starvation	30.3023	364.82
84h in HY	34.5754	354.55		96h in HY	28.8293	569.51		108h in HY	28.4591		84h in HY + 12h starvation	29.0779	372.03		84h in HY + 24h starvation	32.6681	362.83
84h in HY	31.0974	364.41		96h in HY	30.373	597.01		108h in HY	32.2846		84h in HY + 12h starvation	32.5589	375.04		84h in HY + 24h starvation	31.4125	380.81
84h in HY	27.6619	361.37		96h in HY	23.1694	542.05		108h in HY	27.2214		84h in HY + 12h starvation	33.0426	352.31		84h in HY + 24h starvation	34.7368	372.76
84h in HY	26.623	379.57		96h in HY	30.2977	516.36		108h in HY	31.0448		84h in HY + 12h starvation	24.8707	376.53		84h in HY + 24h starvation	32.7488	350.56
84h in HY	36.7218	352.28		96h in HY	26.7857	538.08					84h in HY + 12h starvation	28.5502	408.61		84h in HY + 24h starvation	33.5034	381.85
84h in HY	26.6746	369		96h in HY	24.9018	547.73					84h in HY + 12h starvation	31.7177	419.71
84h in HY	29.2001	363.64		96h in HY	29.7702	536.4					84h in HY + 12h starvation	34.0668	415.92
				96h in HY	27.1623	642.43					84h in HY + 12h starvation	32.3949	430.3
				96h in HY	26.0245	558.09
				96h in HY	31.3825
				96h in HY	27.362
				96h in HY	26.2214
				96h in HY	26.0391
				96h in HY	27.9828
				96h in HY	24.7119
				96h in HY	28.107
				96h in HY	28.8293
				96h in HY	30.373
				96h in HY	23.1694
				96h in HY	30.2977
				96h in HY	26.7857
				96h in HY	24.9018
				96h in HY	29.7702
				96h in HY	27.1623
mean	30.7778	371.786			27.4909	560.882			29.2566			30.6917	391.125			33.5648	384.134
SD	3.2734	18.7891			2.27238	34.9461			2.30154			2.63398	27.2772			1.82747	23.1879
n=	14	14			31	16			11			15	15			12	12
