# Supplementary material for: Low FoxO expression in Drosophila somatosensory neurons protects dendrite growth under nutrient restriction
Source: eLife. 2020 May 19;9:e53351. doi: 10.7554/eLife.53351 (PMC7308081; doi:10.7554/eLife.53351)
Supplement: Figure 2—source data 1. [file elife-53351-fig2-data1.xlsx]

## Sheet: fig 2-GH
genotype	condition	normalized dendrite length		genotype	condition	normalized dendrite length		genotype	condition	normalized dendrite length		genotype	condition	normalized dendrite length		genotype	condition	normalized dendrite length		genotype	condition	normalized dendrite length		genotype	condition	normalized dendrite length		genotype	condition	normalized dendrite length		genotype	condition	normalized dendrite length		genotype	condition	normalized dendrite length
Gal4ppk	HY	31.5396		Gal4ppk	LY	44.4735		InR RNAi	HY	30.8289		InR RNAi	LY	40.5854		InR DN	HY	25.2667		InR DN	LY	31.5194		Tor RNAi	HY	29.7422		Tor RNAi	LY	29.579		Tor DN	HY	25.8847		Tor DN	LY	26.0776
Gal4ppk	HY	28.7382		Gal4ppk	LY	42.1343		InR RNAi	HY	30.4161		InR RNAi	LY	35.1112		InR DN	HY	21.5176		InR DN	LY	31.72		Tor RNAi	HY	24.4201		Tor RNAi	LY	35.5407		Tor DN	HY	26.1731		Tor DN	LY	23.7905
Gal4ppk	HY	27.1947		Gal4ppk	LY	39.2713		InR RNAi	HY	28.6481		InR RNAi	LY	31.2625		InR DN	HY	25.9625		InR DN	LY	25.1325		Tor RNAi	HY	26.3527		Tor RNAi	LY	33.3206		Tor DN	HY	22.5758		Tor DN	LY	24.2415
Gal4ppk	HY	30.2561		Gal4ppk	LY	38.0767		InR RNAi	HY	24.1139		InR RNAi	LY	32.6177		InR DN	HY	22.9563		InR DN	LY	32.1575		Tor RNAi	HY	30.5967		Tor RNAi	LY	25.5758		Tor DN	HY	25.1604		Tor DN	LY	24.514
Gal4ppk	HY	31.0871		Gal4ppk	LY	38.6845		InR RNAi	HY	27.0709		InR RNAi	LY	35.0555		InR DN	HY	27.8259		InR DN	LY	20.5299		Tor RNAi	HY	24.9517		Tor RNAi	LY	26.4162		Tor DN	HY	21.1299		Tor DN	LY	26.1586
Gal4ppk	HY	28.5		Gal4ppk	LY	40.9464		InR RNAi	HY	22.6901		InR RNAi	LY	34.5945		InR DN	HY	27.387		InR DN	LY	22.8083		Tor RNAi	HY	29.5823		Tor RNAi	LY	26.4531		Tor DN	HY	19.1615		Tor DN	LY	26.2334
Gal4ppk	HY	29.6332		Gal4ppk	LY	39.9098		InR RNAi	HY	22.3083		InR RNAi	LY	33.3434		InR DN	HY	25.5486		InR DN	LY	19.9633		Tor RNAi	HY	28.8118		Tor RNAi	LY	30.7529		Tor DN	HY	22.5994		Tor DN	LY	25.6953
Gal4ppk	HY	28.6827		Gal4ppk	LY	39.7539		InR RNAi	HY	29.229		InR RNAi	LY	33.3119		InR DN	HY	25.9613		InR DN	LY	24.3697		Tor RNAi	HY	33.1392		Tor RNAi	LY	33.3557		Tor DN	HY	23.6555		Tor DN	LY	26.8935
Gal4ppk	HY	27.2362		Gal4ppk	LY	37.3736		InR RNAi	HY	21.5788		InR RNAi	LY	29.9918		InR DN	HY	25.1314		InR DN	LY	25.7751		Tor RNAi	HY	28.9547		Tor RNAi	LY	36.543		Tor DN	HY	25.104		Tor DN	LY	27.425
Gal4ppk	HY	26.7242		Gal4ppk	LY	47.7543		InR RNAi	HY	25.2805		InR RNAi	LY	32.9772		InR DN	HY	24.2351		InR DN	LY	28.8592		Tor RNAi	HY	31.2084		Tor RNAi	LY	26.3565		Tor DN	HY	21.3716		Tor DN	LY	27.1483
Gal4ppk	HY	26.8522		Gal4ppk	LY	46.7101		InR RNAi	HY	29.471		InR RNAi	LY	36.2555		InR DN	HY	21.2206		InR DN	LY	25.7557		Tor RNAi	HY	27.9867		Tor RNAi	LY	31.3537		Tor DN	HY	20.4891		Tor DN	LY	23.2997
Gal4ppk	HY	27.3655		Gal4ppk	LY	43.482		InR RNAi	HY	23.7042		InR RNAi	LY	33.8679						InR DN	LY	24.5819		Tor RNAi	HY	27.713		Tor RNAi	LY	32.9529		Tor DN	HY	19.0266		Tor DN	LY	26.0927
Gal4ppk	HY	29.031		Gal4ppk	LY	39.6107		InR RNAi	HY	26.5776										InR DN	LY	27.8683		Tor RNAi	HY	25.8031		Tor RNAi	LY	30.8333		Tor DN	HY	20.5925		Tor DN	LY	28.9465
Gal4ppk	HY	26.4312		Gal4ppk	LY	37.0804		InR RNAi	HY	27.5847										InR DN	LY	22.9033		Tor RNAi	HY	21.2033		Tor RNAi	LY	34.7399		Tor DN	HY	22.849		Tor DN	LY	25.4648
								InR RNAi	HY	24.6785														Tor RNAi	HY	25.4243		Tor RNAi	LY	34.557		Tor DN	HY	19.1113		Tor DN	LY	24.5244
mean		28.5194				41.0901				26.2787				34.0812				24.8193				25.996				27.726				31.222				22.3256				25.767
SD		1.65026				3.37078				3.05143				2.67168				2.16188				3.96558				3.07051				3.6537				2.46908				1.51517
n		14				14				15				12				11				14				15				15				15				15

## Sheet: fig 2-L
genotype	normalized dendrite length		genotype	normalized dendrite length		genotype	normalized dendrite length		genotype	normalized dendrite length		genotype	normalized dendrite length
Gal4R38F11	34.3064		InR RNAi	40.1478		InR DN	46.563		Tor RNAi	52.5692		Tor DN	46.3175
Gal4R38F12	32.0312		InR RNAi	37.0953		InR DN	48.8975		Tor RNAi	52.4507		Tor DN	40.8432
Gal4R38F13	31.6979		InR RNAi	36.9944		InR DN	50.1991		Tor RNAi	47.5549		Tor DN	35.6425
Gal4R38F14	30.7265		InR RNAi	39.6137		InR DN	49.0878		Tor RNAi	55.6763		Tor DN	37.2782
Gal4R38F15	30.2646		InR RNAi	36.4574		InR DN	48.5643		Tor RNAi	48.6015		Tor DN	37.4631
Gal4R38F16	31.5682		InR RNAi	36.1195		InR DN	54.2898		Tor RNAi	50.369		Tor DN	40.7665
Gal4R38F17	31.3915		InR RNAi	40.7841		InR DN	50.2304		Tor RNAi	48.8317		Tor DN	43.5713
Gal4R38F18	32.9301		InR RNAi	41.0286		InR DN	48.1867		Tor RNAi	48.8444		Tor DN	40.7701
Gal4R38F19	27.6684		InR RNAi	37.5907		InR DN	41.3258		Tor RNAi	47.194		Tor DN	44.1933
Gal4R38F20	33.2591		InR RNAi	35.8823		InR DN	46.4215		Tor RNAi	52.9866		Tor DN	44.4746
Gal4R38F21	31.562		InR RNAi	37.1287		InR DN	47.8412		Tor RNAi	50.8682		Tor DN	43.9689
Gal4R38F22	27.1565		InR RNAi	38.5314		InR DN	49.4811		Tor RNAi	52.2975		Tor DN	43.4067
Gal4R38F23	27.9608		InR RNAi	34.5998		InR DN	45.7978		Tor RNAi	42.1688		Tor DN	39.2224
Gal4R38F24	33.7052		InR RNAi	35.7895		InR DN	41.0073		Tor RNAi	53.8621		Tor DN	39.0342
Gal4R38F25	32.0016		InR RNAi	37.2007					Tor RNAi	51.8266		Tor DN	37.55
Gal4R38F26	29.9225		InR RNAi	43.8245					Tor RNAi	49.8072		Tor DN	43.6735
Gal4R38F27	30.6101		InR RNAi	37.5069								Tor DN	44.3505
Gal4R38F28	29.8149
Gal4R38F29	30.2076
Gal4R38F30	34.4047
Gal4R38F31	34.9683
Gal4R38F32	33.9523
Gal4R38F33	29.5188
mean	31.3752			38.1697			46.1098			49.984			42.2014
SD	2.17951			2.71209			3.18565			3.60165			2.54879
n	23			17			14			16			17

## Sheet: fig 2-P
group	condition	pRpS6 intensity ratio		group	condition	pRpS6 intensity ratio		group	condition	pRpS6 intensity ratio		group	condition	pRpS6 intensity ratio
cell body/epi	LY	1.41187		dendrites/epi	LY	1.42714		cell body/epi	HY	0.226349		dendrites/epi	HY	0.257698
cell body/epi	LY	1.31403		dendrites/epi	LY	1.4291		cell body/epi	HY	0.367484		dendrites/epi	HY	0.302603
cell body/epi	LY	1.21923		dendrites/epi	LY	1.48745		cell body/epi	HY	0.438361		dendrites/epi	HY	0.368955
cell body/epi	LY	1.89016		dendrites/epi	LY	1.22331		cell body/epi	HY	0.421034		dendrites/epi	HY	0.923389
cell body/epi	LY	0.824394		dendrites/epi	LY	1.0327		cell body/epi	HY	0.0987385		dendrites/epi	HY	0.05612
cell body/epi	LY	0.875015		dendrites/epi	LY	1.6411		cell body/epi	HY	0.139326		dendrites/epi	HY	0.554202
cell body/epi	LY	1.3299		dendrites/epi	LY	1.37081		cell body/epi	HY	0.53101		dendrites/epi	HY	0.09201
cell body/epi	LY	2.41431		dendrites/epi	LY	1.61601		cell body/epi	HY	0.134678		dendrites/epi	HY	0.259368
cell body/epi	LY	1.12914		dendrites/epi	LY	1.71325		cell body/epi	HY	0.171155		dendrites/epi	HY	0.0668441
cell body/epi	LY	1.60471		dendrites/epi	LY	1.55404		cell body/epi	HY	0.325452		dendrites/epi	HY	0.171193
cell body/epi	LY	1.14062		dendrites/epi	LY	1.31625		cell body/epi	HY	0.153938		dendrites/epi	HY	0.152015
cell body/epi	LY	0.874116		dendrites/epi	LY	0.867987		cell body/epi	HY	0.45667		dendrites/epi	HY	0.467741
cell body/epi	LY	1.57992		dendrites/epi	LY	1.79774		cell body/epi	HY	0.462632		dendrites/epi	HY	0.442458
cell body/epi	LY	1.6041		dendrites/epi	LY	1.12104		cell body/epi	HY	0.727328		dendrites/epi	HY	0.263847
cell body/epi	LY	2.09384		dendrites/epi	LY	1.79671		cell body/epi	HY	0.406656		dendrites/epi	HY	0.311854
cell body/epi	LY	1.86904		dendrites/epi	LY	1.60756		cell body/epi	HY	0.0826233		dendrites/epi	HY	0.200168
cell body/epi	LY	0.912617		dendrites/epi	LY	1.04969		cell body/epi	HY	0.0463416		dendrites/epi	HY	0.0952233
cell body/epi	LY	2.14455		dendrites/epi	LY	1.29833
cell body/epi	LY	1.82363		dendrites/epi	LY	2.46195
cell body/epi	LY	3.34593		dendrites/epi	LY	1.17116
mean		1.57006				1.44917				0.305281				0.293276
SD		0.621344				0.354979				0.191291				0.217663
n		20				20				17				17

## Sheet: S1-N
genotype	epidermal size ratio		genotype	epidermal size ratio		genotype	epidermal size ratio		genotype	epidermal size ratio		genotype	epidermal size ratio
Gal4R16D01	0.691235		InR RNAi	0.676509		InR DN	0.297755		Tor RNAi	0.539394		Tor DN	0.254081
Gal4R16D01	0.670081		InR RNAi	0.475542		InR DN	0.379648		Tor RNAi	0.616152		Tor DN	0.354657
Gal4R16D01	0.741625		InR RNAi	0.571572		InR DN	0.273483		Tor RNAi	0.584582		Tor DN	0.352186
Gal4R16D01	0.802028		InR RNAi	0.525257		InR DN	0.211636		Tor RNAi	0.543484		Tor DN	0.342597
Gal4R16D01	0.66094		InR RNAi	0.575569		InR DN	0.212733		Tor RNAi	0.53272		Tor DN	0.408216
Gal4R16D01	0.632559		InR RNAi	0.577432		InR DN	0.377513		Tor RNAi	0.48452		Tor DN	0.355581
Gal4R16D01	0.637212		InR RNAi	0.520692		InR DN	0.234521		Tor RNAi	0.523762		Tor DN	0.364048
Gal4R16D01	0.727659		InR RNAi	0.57173		InR DN	0.277069		Tor RNAi	0.535633		Tor DN	0.378525
Gal4R16D01	0.689367		InR RNAi	0.426866		InR DN	0.235746		Tor RNAi	0.363933		Tor DN	0.351331
Gal4R16D01	0.669261		InR RNAi	0.578498		InR DN	0.334655		Tor RNAi	0.565846		Tor DN	0.357315
Gal4R16D01	0.822211		InR RNAi	0.576248		InR DN	0.266157		Tor RNAi	0.624598		Tor DN	0.350276
Gal4R16D01	0.61325		InR RNAi	0.483271		InR DN	0.309957		Tor RNAi	0.421824		Tor DN	0.328013
Gal4R16D01	0.719712		InR RNAi	0.486852		InR DN	0.232531		Tor RNAi	0.486798		Tor DN	0.385551
Gal4R16D01	0.608373		InR RNAi	0.57539		InR DN	0.34784		Tor RNAi	0.494488		Tor DN	0.305123
Gal4R16D01	0.752307		InR RNAi	0.635588					Tor RNAi	0.587102
Gal4R16D01	0.664228		InR RNAi	0.546728					Tor RNAi	0.623089
Gal4R16D01	0.680814		InR RNAi	0.589611					Tor RNAi	0.510197
Gal4R16D01	0.813678		InR RNAi	0.494877					Tor RNAi	0.406594
			InR RNAi	0.521467
			InR RNAi	0.663398
mean	0.699808			0.549346			0.285089			0.524706			0.349107
SD	0.0657555			0.0608989			0.057912			0.0737653			0.0367093
n	18			20			14			18			14
