# Supplementary material for: Low FoxO expression in Drosophila somatosensory neurons protects dendrite growth under nutrient restriction
Source: eLife. 2020 May 19;9:e53351. doi: 10.7554/eLife.53351 (PMC7308081; doi:10.7554/eLife.53351)
Supplement: Figure 3—source data 1. [file elife-53351-fig3-data1.xlsx]

## Sheet: fig 3-C
tissue	condition	%Area		tissue	condition	%Area		tissue	condition	%Area		tissue	condition	%Area
epi	HY	2.41059		epi	LY	11.32		ddaC	HY	1.21804		ddaC	LY	0.944314
epi	HY	2.24706		epi	LY	12.2039		ddaC	HY	1.55451		ddaC	LY	1.27333
epi	HY	2.45176		epi	LY	11.3522		ddaC	HY	1.35961		ddaC	LY	0.896863
epi	HY	1.7149		epi	LY	9.99529		ddaC	HY	0.813725		ddaC	LY	0.983137
epi	HY	0.943137		epi	LY	9.4749		ddaC	HY	0.978431		ddaC	LY	1.58196
epi	HY	0.258824		epi	LY	10.4478		ddaC	HY	0.270196		ddaC	LY	2.70902
epi	HY	3.49804		epi	LY	7.64275		ddaC	HY	0.921961		ddaC	LY	0.563529
epi	HY	1.89451		epi	LY	8.46157		ddaC	HY	2.74588		ddaC	LY	1.05098
epi	HY	1.93333		epi	LY	8.40588		ddaC	HY	2.0098		ddaC	LY	2.43725
epi	HY	1.63412		epi	LY	7.94667		ddaC	HY	2.0502		ddaC	LY	3.35608
epi	HY	1.70196		epi	LY	6.81804		ddaC	HY	1.64431		ddaC	LY	1.33882
epi	HY	1.83255		epi	LY	7.64706		ddaC	HY	1.90353		ddaC	LY	1.95882
				epi	LY	8.3498						ddaC	LY	4.01843
mean		1.87673				9.23584				1.45585				1.77789
SD		0.797253				1.69259				0.671961				1.05817
n		12				13				12				13

## Sheet: fig 3-H
genotype	condition	epi size ratio		genotype	condition	epi size ratio		genotype	condition	epi size ratio		genotype	condition	epi size ratio
Gal4R16D01	HY	0.691235		atg8a RNAi	HY	0.729488		Gal4R16D01	LY	0.761679		atg8a RNAi	LY	0.820212
Gal4R16D01	HY	0.670081		atg8a RNAi	HY	0.712758		Gal4R16D01	LY	0.696984		atg8a RNAi	LY	0.680538
Gal4R16D01	HY	0.741625		atg8a RNAi	HY	0.642049		Gal4R16D01	LY	0.768453		atg8a RNAi	LY	0.820586
Gal4R16D01	HY	0.802028		atg8a RNAi	HY	0.726681		Gal4R16D01	LY	0.737468		atg8a RNAi	LY	0.831389
Gal4R16D01	HY	0.66094		atg8a RNAi	HY	0.538721		Gal4R16D01	LY	0.819349		atg8a RNAi	LY	0.813572
Gal4R16D01	HY	0.632559		atg8a RNAi	HY	0.97449		Gal4R16D01	LY	0.613313		atg8a RNAi	LY	0.808007
Gal4R16D01	HY	0.637212		atg8a RNAi	HY	0.633973		Gal4R16D01	LY	0.719218		atg8a RNAi	LY	0.761398
Gal4R16D01	HY	0.727659		atg8a RNAi	HY	0.813853		Gal4R16D01	LY	0.831305		atg8a RNAi	LY	0.654322
Gal4R16D01	HY	0.689367		atg8a RNAi	HY	0.76249		Gal4R16D01	LY	0.635601		atg8a RNAi	LY	1.09163
Gal4R16D01	HY	0.669261		atg8a RNAi	HY	0.789095		Gal4R16D01	LY	0.70004		atg8a RNAi	LY	0.702796
Gal4R16D01	HY	0.822211		atg8a RNAi	HY	0.947755		Gal4R16D01	LY	0.78508		atg8a RNAi	LY	0.797142
Gal4R16D01	HY	0.61325		atg8a RNAi	HY	0.81911		Gal4R16D01	LY	0.632665		atg8a RNAi	LY	0.92947
Gal4R16D01	HY	0.719712		atg8a RNAi	HY	0.707046		Gal4R16D01	LY	0.6937		atg8a RNAi	LY	0.702796
Gal4R16D01	HY	0.608373		atg8a RNAi	HY	0.856245		Gal4R16D01	LY	0.48291		atg8a RNAi	LY	0.797142
Gal4R16D01	HY	0.752307						Gal4R16D01	LY	0.636131		atg8a RNAi	LY	0.92947
Gal4R16D01	HY	0.664228						Gal4R16D01	LY	0.738352		atg8a RNAi	LY	0.746573
Gal4R16D01	HY	0.680814										atg8a RNAi	LY	0.902426
Gal4R16D01	HY	0.813678										atg8a RNAi	LY	0.894922
												atg8a RNAi	LY	0.787596
mean		0.699808				0.760982				0.703266				0.814315
SD		0.0657555				0.118838				0.0885963				0.104124
n		18				14				15				19

## Sheet: fig 3-I
genotype	condition	normalized dendrite length		genotype	condition	normalized dendrite length		genotype	condition	normalized dendrite length		genotype	condition	normalized dendrite length
Gal4ppk	HY	31.5396		atg8a RNAi	HY	33.9401		Gal4ppk	LY	44.4735		atg8a RNAi	LY	43.9421
Gal4ppk	HY	28.7382		atg8a RNAi	HY	33.5803		Gal4ppk	LY	42.1343		atg8a RNAi	LY	48.2432
Gal4ppk	HY	27.1947		atg8a RNAi	HY	34.5707		Gal4ppk	LY	39.2713		atg8a RNAi	LY	40.3402
Gal4ppk	HY	30.2561		atg8a RNAi	HY	33.3648		Gal4ppk	LY	38.0767		atg8a RNAi	LY	49.1292
Gal4ppk	HY	31.0871		atg8a RNAi	HY	32.7852		Gal4ppk	LY	38.6845		atg8a RNAi	LY	47.8617
Gal4ppk	HY	28.5		atg8a RNAi	HY	34.8916		Gal4ppk	LY	40.9464		atg8a RNAi	LY	43.6198
Gal4ppk	HY	29.6332		atg8a RNAi	HY	33.5136		Gal4ppk	LY	39.9098		atg8a RNAi	LY	44.3648
Gal4ppk	HY	28.6827		atg8a RNAi	HY	31.9697		Gal4ppk	LY	39.7539		atg8a RNAi	LY	53.4498
Gal4ppk	HY	27.2362		atg8a RNAi	HY	33.143		Gal4ppk	LY	37.3736		atg8a RNAi	LY	45.8892
Gal4ppk	HY	26.7242		atg8a RNAi	HY	30.1621		Gal4ppk	LY	47.7543		atg8a RNAi	LY	47.9415
Gal4ppk	HY	26.8522		atg8a RNAi	HY	33.8501		Gal4ppk	LY	46.7101		atg8a RNAi	LY	40.6311
Gal4ppk	HY	27.3655		atg8a RNAi	HY	33.6115		Gal4ppk	LY	43.482		atg8a RNAi	LY	46.1729
Gal4ppk	HY	29.031		atg8a RNAi	HY	29.3516		Gal4ppk	LY	39.6107
Gal4ppk	HY	26.4312		atg8a RNAi	HY	36.5559		Gal4ppk	LY	37.0804
				atg8a RNAi	HY	34.284
				atg8a RNAi	HY	34.6698
me+A21:O23an		28.5194				33.3903				41.0901				45.9655
SD		1.65026				1.74922				3.37078				3.70526
n		14				16				14				12

## Sheet: fig 3-L
gonotype	normalized length		gonotype	normalized length
Gal4ppk	44.4735		mitf OE	15.974
Gal4ppk	42.1343		mitf OE	10.8398
Gal4ppk	39.2713		mitf OE	16.0769
Gal4ppk	38.0767		mitf OE	12.0201
Gal4ppk	38.6845		mitf OE	13.2255
Gal4ppk	40.9464		mitf OE	13.8021
Gal4ppk	39.9098		mitf OE	13.8141
Gal4ppk	39.7539		mitf OE	12.0066
Gal4ppk	37.3736		mitf OE	10.8225
Gal4ppk	47.7543		mitf OE	14.0136
Gal4ppk	46.7101		mitf OE	12.4452
Gal4ppk	43.482		mitf OE	14.5705
Gal4ppk	39.6107		mitf OE	15.1658
Gal4ppk	37.0804		mitf OE	11.6787
			mitf OE	19.2687
mean	41.0901			13.7149
SD	3.37078			2.2818
n	14			15

## Sheet: S1-C
tissue	condition	% area		tissue	condition	% area		tissue	condition	% area		tissue	condition	% area
epi	HY	1.63412		epi	LY	5.84588		neuron	HY	0.052549		neuron	LY	0.094902
epi	HY	2.56627		epi	LY	4.80157		neuron	HY	0.0286275		neuron	LY	1.46902
epi	HY	0.91098		epi	LY	6.32353		neuron	HY	0		neuron	LY	0.299216
epi	HY	1.46902		epi	LY	11.8247		neuron	HY	0.0752941		neuron	LY	0.251765
epi	HY	3.09529		epi	LY	13.382		neuron	HY	0.381176		neuron	LY	0.437255
epi	HY	1.69922		epi	LY	12.591		neuron	HY	0.147059		neuron	LY	0.187843
epi	HY	4.63412		epi	LY	12.2847		neuron	HY	0.210588		neuron	LY	0.649412
epi	HY	3.68863		epi	LY	10.0549		neuron	HY	0.0615686		neuron	LY	0.11098
epi	HY	1.07255		epi	LY	7.19412		neuron	HY	0.160784		neuron	LY	0.201176
epi	HY	0.938431		epi	LY	5.0251		neuron	HY	0.025098		neuron	LY	0.0615686
epi	HY	1.48078						neuron	HY	0.18
mean		2.10813				8.93275				0.12025				0.376314
SD		1.23007				3.42754				0.111415				0.42277
n		11				10				11				10

## Sheet: S1-FI
tissue	condition	% area/GFP		tissue	condition	% area/GFP		tissue	condition	% area/GFP		tissue	condition	% area/GFP
epi	HY	0.035733		epi	LY	0.217443		neuron	HY	0.0086		neuron	LY	0.0904496
epi	HY	0.0163961		epi	LY	0.243425		neuron	HY	0.00071		neuron	LY	0.0482789
epi	HY	0.0252344		epi	LY	0.270875		neuron	HY	0.00626		neuron	LY	0.0699139
epi	HY	0.0402766		epi	LY	0.199999		neuron	HY	0.00645		neuron	LY	0.0807033
epi	HY	0.0231769		epi	LY	0.271734		neuron	HY	0.0143831		neuron	LY	0.10114
epi	HY	0.0310941		epi	LY	0.208124		neuron	HY	0		neuron	LY	0.103202
epi	HY	0.0365592		epi	LY	0.20956		neuron	HY	0.0132903		neuron	LY	0.134551
epi	HY	0.0268739		epi	LY	0.281359		neuron	HY	0.00921		neuron	LY	0.117653
epi	HY	0.0155543		epi	LY	0.299618		neuron	HY	0.00902		neuron	LY	0.0876894
epi	HY	0.0142208		epi	LY	0.291131		neuron	HY	0.00755		neuron	LY	0.113192
								neuron	HY	0.0280581		neuron	LY	0.0705062
								neuron	HY	0.0158179		neuron	LY	0.12019
								neuron	HY	0.00782		neuron	LY	0.11627
								neuron	HY	0.0173257		neuron	LY	0.11044
								neuron	HY	0.016743		neuron	LY	0.100714
								neuron	HY	0.0141358
mean		0.0265119				0.249327				0.0109609				0.0976596
SD		0.00932617				0.038054				0.00692166				0.0230774
n		10				10				16				15

## Sheet: S2-G
genotype	condition	intensity		genotype	condition	intensity		genotype	condition	intensity		genotype	condition	intensity
epi	HY	46.4433		epi	LY	59.02		ddac	HY	1.48		ddac	LY	1
epi	HY	65.66		epi	LY	54.0367		ddac	HY	1.38		ddac	LY	0.81
epi	HY	63.5333		epi	LY	56.48		ddac	HY	1.83		ddac	LY	0.75
epi	HY	51.6167		epi	LY	57.92		ddac	HY	1.71		ddac	LY	1.13
epi	HY	48.41		epi	LY	58.0933		ddac	HY	1.1		ddac	LY	1.04
epi	HY	45.3433		epi	LY	42.9633		ddac	HY	1.41		ddac	LY	1.13
epi	HY	44.4567		epi	LY	45.6133		ddac	HY	1.45		ddac	LY	1.38
epi	HY	47.6967		epi	LY	47.88		ddac	HY	1.85		ddac	LY	0.82
epi	HY	46.1833		epi	LY	42.7		ddac	HY	1.53		ddac	LY	0.71
epi	HY	53.2167		epi	LY	46.0067		ddac	HY	1.64		ddac	LY	0.76
epi	HY	49.8		epi	LY	43.31		ddac	HY	1.2		ddac	LY	0.46
epi	HY	37.85		epi	LY	42.82		ddac	HY	2.33		ddac	LY	0.64
epi	HY	64.1267		epi	LY	42.6667		ddac	HY	1.4		ddac	LY	0.45
epi	HY	54.5967		epi	LY	42.79		ddac	HY	1.53		ddac	LY	1.1
epi	HY	40.4367		epi	LY	36.8667		ddac	HY	2.06		ddac	LY	0.79
epi	HY	51.1033		epi	LY	45.86		ddac	HY	1.88		ddac	LY	0.97
epi	HY	54.285		epi	LY	51.7867		ddac	HY	2.44		ddac	LY	1.31
epi	HY	50.2933
mean		50.8362				48.0478				1.66				0.897059
SD		7.65315				6.80287				0.368917				0.267763
n		18				17				17				17
