# Supplementary material for: Low FoxO expression in Drosophila somatosensory neurons protects dendrite growth under nutrient restriction
Source: eLife. 2020 May 19;9:e53351. doi: 10.7554/eLife.53351 (PMC7308081; doi:10.7554/eLife.53351)
Supplement: Figure 4—source data 1. [file elife-53351-fig4-data1.xlsx]

## Sheet: fig 4-C
tissue	condition	intensity		tiuue	condition	intensity		tissue	condition	intensity		tissue	condition	intensity
epi	HY	38.1967		epi	LY	33.4067		ddaC	HY	6.09		ddaC	LY	3.6
epi	HY	39.4967		epi	LY	41.7867		ddaC	HY	5.78		ddaC	LY	3.47
epi	HY	36.3767		epi	LY	42.6967		ddaC	HY	4.17		ddaC	LY	12.37
epi	HY	43.8067		epi	LY	43.37		ddaC	HY	5.27		ddaC	LY	3.43
epi	HY	37.8333		epi	LY	45.7033		ddaC	HY	6.42		ddaC	LY	3.2
epi	HY	47.7233		epi	LY	41.6567		ddaC	HY	7.86		ddaC	LY	1.03
epi	HY	36.9833		epi	LY	34.7433		ddaC	HY	5.65		ddaC	LY	2.8
epi	HY	36.5067		epi	LY	30.13		ddaC	HY	4.05		ddaC	LY	4.22
epi	HY	42.14		epi	LY	43.93		ddaC	HY	5.2		ddaC	LY	4.82
epi	HY	43.6233		epi	LY	38.8867		ddaC	HY	4.67		ddaC	LY	5.18
epi	HY	44.3367		epi	LY	39.7667		ddaC	HY	4.85		ddaC	LY	4.84
epi	HY	44.5733		epi	LY	42.11		ddaC	HY	6.27		ddaC	LY	5.2
epi	HY	40.3933		epi	LY	43.58		ddaC	HY	7.48		ddaC	LY	4.6
epi	HY	42.2667		epi	LY	40.0733		ddaC	HY	3.89		ddaC	LY	3.3
epi	HY	38.8267						ddaC	HY	4.63
epi	HY	33.8233						ddaC	HY	7.24
epi	HY	38.6667						ddaC	HY	4.28
epi	HY	41.9367
mean		40.4172				40.1314				5.51765				4.43286
SD		3.60896				4.46685				1.23399				2.54512
n		18				14				17				14

## Sheet: fig 4-D
tissue	condition	intensity		tissue	condition	intensity		tissue	condition	intensity		tissue	condition	intensity
epi	HY	65.14		epi	LY	52.42		c4	HY	29.67		c4	LY	32.43
epi	HY	71.76		epi	LY	62.63		c4	HY	30.28		c4	LY	32.02
epi	HY	70.46		epi	LY	67.19		c4	HY	29.93		c4	LY	27.7
epi	HY	57.24		epi	LY	79.81		c4	HY	34.36		c4	LY	25.4
epi	HY	53.5		epi	LY	78.61		c4	HY	29.25		c4	LY	26.7
epi	HY	42.55		epi	LY	65.1		c4	HY	20.04		c4	LY	30.44
epi	HY	71.92		epi	LY	71.56		c4	HY	30.41		c4	LY	31.56
epi	HY	41.84		epi	LY	66.87		c4	HY	26.18		c4	LY	39.79
epi	HY	77.31		epi	LY	70.08		c4	HY	31.74		c4	LY	32.77
epi	HY	60.9		epi	LY	72.45		c4	HY	44.22		c4	LY	27.59
epi	HY	63.51		epi	LY	58.58		c4	HY	29.7		c4	LY	23.6
epi	HY	62.95		epi	LY	61.21		c4	HY	58.21		c4	LY	29.69
epi	HY	57.2		epi	LY	56.15		c4	HY	28.58		c4	LY	35.11
epi	HY	69.87						c4	HY	34.34
epi	HY	44.74						c4	HY	44.39
epi	HY	71.8						c4	HY	59.3
epi	HY	49.93						c4	HY	10.52
mean		60.7424				66.3585				33.5953				30.3692
SD		11.1558				8.22091				12.1989				4.32698
n		17				13				17				13

## Sheet: fig 4-G
tissue	condition	value		tissue	condition	value		tissue	condition	value		tissue	condition	value
epi	HY	28.91		epi	LY	111.637		ddaC	HY	3.42		ddaC	LY	14.26
epi	HY	30.8467		epi	LY	117.82		ddaC	HY	3.93		ddaC	LY	4.78
epi	HY	32.3567		epi	LY	117.583		ddaC	HY	3.35		ddaC	LY	18.21
epi	HY	36.7933		epi	LY	112.877		ddaC	HY	4.36		ddaC	LY	5.6
epi	HY	34.2167		epi	LY	103.57		ddaC	HY	1.99		ddaC	LY	6.87
epi	HY	31.57		epi	LY	79.1733		ddaC	HY	2.03		ddaC	LY	4.01
epi	HY	31.07		epi	LY	79.5067		ddaC	HY	1.51		ddaC	LY	2.07
epi	HY	31.9033		epi	LY	81.5833		ddaC	HY	2.68		ddaC	LY	3.78
epi	HY	28.0467		epi	LY	91.6367		ddaC	HY	2.51		ddaC	LY	6.21
epi	HY	27.8367		epi	LY	112.64		ddaC	HY	2.46		ddaC	LY	5.35
epi	HY	27.3167		epi	LY	107.503		ddaC	HY	2.37		ddaC	LY	5.55
epi	HY	34.0033		epi	LY	97.97		ddaC	HY	3.04		ddaC	LY	7.33
epi	HY	31.8233		epi	LY	85.5333		ddaC	HY	2.34		ddaC	LY	9.04
epi	HY	32.48		epi	LY	87.04		ddaC	HY	3.13		ddaC	LY	4.34
epi	HY	39.9933		epi	LY	75.1167		ddaC	HY	3.18		ddaC	LY	3.19
epi	HY	36.5233		epi	LY	74.3033		ddaC	HY	3.58		ddaC	LY	5.16
epi	HY	37.1333		epi	LY	96.3867		ddaC	HY	1.74		ddaC	LY	3.92
epi	HY	39.1033		epi	LY	72.25		ddaC	HY	3.26		ddaC	LY	2.55
epi	HY	32.7		epi	LY	115.327
mean		32.8751				95.7609				2.82667				6.23444
SD		3.69856				16.2567				0.773183				4.07523
n		19				19				18				18

## Sheet: fig 4-N
genotype	condition	normailzed denrite length		genotype	condition	normailzed denrite length		genotype	condition	normailzed denrite length			genotype	condition	normailzed denrite length		genotype	condition	normailzed denrite length		genotype	condition	normailzed denrite length
Gal4ppk	HY	31.5396		foxo RNAi	HY	29.1754		foxo OE	HY	25.9382			Gal4ppk	LY	44.4735		foxo RNAi	LY	38.1855		foxo OE	LY	24.4686
Gal4ppk	HY	28.7382		foxo RNAi	HY	30.4921		foxo OE	HY	25.3344			Gal4ppk	LY	42.1343		foxo RNAi	LY	35.7638		foxo OE	LY	23.2969
Gal4ppk	HY	27.1947		foxo RNAi	HY	22.969		foxo OE	HY	27.5394			Gal4ppk	LY	39.2713		foxo RNAi	LY	45.3607		foxo OE	LY	20.983
Gal4ppk	HY	30.2561		foxo RNAi	HY	28.3303		foxo OE	HY	25.4542			Gal4ppk	LY	38.0767		foxo RNAi	LY	41.8811		foxo OE	LY	15.6639
Gal4ppk	HY	31.0871		foxo RNAi	HY	30.4133		foxo OE	HY	23.7936			Gal4ppk	LY	38.6845		foxo RNAi	LY	46.1635		foxo OE	LY	18.7346
Gal4ppk	HY	28.5		foxo RNAi	HY	33.1445		foxo OE	HY	23.8336			Gal4ppk	LY	40.9464		foxo RNAi	LY	42.1922		foxo OE	LY	19.1461
Gal4ppk	HY	29.6332		foxo RNAi	HY	25.0852		foxo OE	HY	26.6252			Gal4ppk	LY	39.9098		foxo RNAi	LY	41.9053		foxo OE	LY	20.9302
Gal4ppk	HY	28.6827		foxo RNAi	HY	26.9425		foxo OE	HY	25.2577			Gal4ppk	LY	39.7539		foxo RNAi	LY	43.0752		foxo OE	LY	23.4759
Gal4ppk	HY	27.2362		foxo RNAi	HY	28.5569		foxo OE	HY	23.9146			Gal4ppk	LY	37.3736		foxo RNAi	LY	44.5362		foxo OE	LY	26.9438
Gal4ppk	HY	26.7242		foxo RNAi	HY	27.9244		foxo OE	HY	29.974			Gal4ppk	LY	47.7543		foxo RNAi	LY	43.6912		foxo OE	LY	22.2225
Gal4ppk	HY	26.8522		foxo RNAi	HY	31.4762		foxo OE	HY	27.4079			Gal4ppk	LY	46.7101		foxo RNAi	LY	40.781		foxo OE	LY	20.1951
Gal4ppk	HY	27.3655						foxo OE	HY	26.5925			Gal4ppk	LY	43.482		foxo RNAi	LY	40.6642		foxo OE	LY	19.7906
Gal4ppk	HY	29.031											Gal4ppk	LY	39.6107		foxo RNAi	LY	43.6671
Gal4ppk	HY	26.4312											Gal4ppk	LY	37.0804
mean		28.5194				28.5918				25.9721					41.0901				42.1436				21.3209
SD		1.65026				2.88903				1.81117					3.37078				2.86298				2.98759
n=		14				11				12					14				13				12

## Sheet: fig 4-S
genotype	condition	epi size ratio		genotype	condition	epi size ratio		genotype	condition	epi size ratio		genotype	condition	epi size ratio
Gal4R16D01	HY	0.691235		Gal4R16D01	LY	0.761679		foxo RNAi	HY	0.579213		foxo RNAi	LY	0.992376
Gal4R16D01	HY	0.670081		Gal4R16D01	LY	0.696984		foxo RNAi	HY	0.7177		foxo RNAi	LY	1.06901
Gal4R16D01	HY	0.741625		Gal4R16D01	LY	0.768453		foxo RNAi	HY	0.839313		foxo RNAi	LY	1.02356
Gal4R16D01	HY	0.802028		Gal4R16D01	LY	0.737468		foxo RNAi	HY	0.799503		foxo RNAi	LY	1.06423
Gal4R16D01	HY	0.66094		Gal4R16D01	LY	0.819349		foxo RNAi	HY	0.586219		foxo RNAi	LY	0.740807
Gal4R16D01	HY	0.632559		Gal4R16D01	LY	0.613313		foxo RNAi	HY	0.800215		foxo RNAi	LY	0.792037
Gal4R16D01	HY	0.637212		Gal4R16D01	LY	0.719218		foxo RNAi	HY	0.817323		foxo RNAi	LY	0.814719
Gal4R16D01	HY	0.727659		Gal4R16D01	LY	0.831305		foxo RNAi	HY	0.692973		foxo RNAi	LY	1.10767
Gal4R16D01	HY	0.689367		Gal4R16D01	LY	0.635601		foxo RNAi	HY	0.70623		foxo RNAi	LY	0.931461
Gal4R16D01	HY	0.669261		Gal4R16D01	LY	0.70004		foxo RNAi	HY	0.849195		foxo RNAi	LY	0.931446
Gal4R16D01	HY	0.822211		Gal4R16D01	LY	0.78508						foxo RNAi	LY	0.803488
Gal4R16D01	HY	0.61325		Gal4R16D01	LY	0.632665						foxo RNAi	LY	0.87969
Gal4R16D01	HY	0.719712		Gal4R16D01	LY	0.6937						foxo RNAi	LY	0.914234
Gal4R16D01	HY	0.608373		Gal4R16D01	LY	0.48291						foxo RNAi	LY	0.848949
Gal4R16D01	HY	0.752307		Gal4R16D01	LY	0.636131						foxo RNAi	LY	1.23386
Gal4R16D01	HY	0.664228		Gal4R16D01	LY	0.738352						foxo RNAi	LY	0.913838
Gal4R16D01	HY	0.680814										foxo RNAi	LY	0.901368
Gal4R16D01	HY	0.813678										foxo RNAi	LY	1.00024
mean		0.699808				0.703266				0.738788				0.942388
SD		0.0657555				0.0885963				0.099033				0.126167
n		18				16				10				18

## Sheet: S1-A
genotype	condition	epi cell size		genotype	condition	epi cell size		genotype	condition	epi cell size		genotype	condition	epi cell size		genotype	condition	epi cell size		genotype	condition	epi cell size		genotype	condition	epi cell size		genotype	condition	epi cell size
Gal4R16D01	HY	0.691235		sesn RNAi	HY	0.671277		crc RNAi	HY	0.733764		sirt2 RNAi	HY	0.757408		Gal4R16D01	LY	0.761679		sesn RNAi	LY	0.769118		crc RNAi	LY	0.851333		sirt2 RNAi	LY	0.759071
Gal4R16D01	HY	0.670081		sesn RNAi	HY	0.712241		crc RNAi	HY	0.604978		sirt2 RNAi	HY	0.810983		Gal4R16D01	LY	0.696984		sesn RNAi	LY	0.643801		crc RNAi	LY	0.661622		sirt2 RNAi	LY	0.916003
Gal4R16D01	HY	0.741625		sesn RNAi	HY	0.671277		crc RNAi	HY	0.643918		sirt2 RNAi	HY	0.714474		Gal4R16D01	LY	0.768453		sesn RNAi	LY	0.764939		crc RNAi	LY	0.9395		sirt2 RNAi	LY	0.768212
Gal4R16D01	HY	0.802028		sesn RNAi	HY	0.712241		crc RNAi	HY	0.742548		sirt2 RNAi	HY	0.767106		Gal4R16D01	LY	0.737468		sesn RNAi	LY	0.875361		crc RNAi	LY	0.736982		sirt2 RNAi	LY	0.779768
Gal4R16D01	HY	0.66094		sesn RNAi	HY	0.514757		crc RNAi	HY	0.800773		sirt2 RNAi	HY	0.795921		Gal4R16D01	LY	0.819349		sesn RNAi	LY	0.816894		crc RNAi	LY	0.936376		sirt2 RNAi	LY	0.754217
Gal4R16D01	HY	0.632559		sesn RNAi	HY	0.987625		crc RNAi	HY	0.687522		sirt2 RNAi	HY	0.746265		Gal4R16D01	LY	0.613313		sesn RNAi	LY	0.710786		crc RNAi	LY	0.907624		sirt2 RNAi	LY	0.705396
Gal4R16D01	HY	0.637212		sesn RNAi	HY	0.602745		crc RNAi	HY	0.625751		sirt2 RNAi	HY	0.806082		Gal4R16D01	LY	0.719218		sesn RNAi	LY	0.949788		crc RNAi	LY	0.664958		sirt2 RNAi	LY	0.803536
Gal4R16D01	HY	0.727659		sesn RNAi	HY	0.676829		crc RNAi	HY	0.731259		sirt2 RNAi	HY	0.759075		Gal4R16D01	LY	0.831305		sesn RNAi	LY	0.847581		crc RNAi	LY	0.617059		sirt2 RNAi	LY	0.827182
Gal4R16D01	HY	0.689367		sesn RNAi	HY	0.475094		crc RNAi	HY	0.725035		sirt2 RNAi	HY	0.696557		Gal4R16D01	LY	0.635601		sesn RNAi	LY	0.776423		crc RNAi	LY	0.690621		sirt2 RNAi	LY	0.794288
Gal4R16D01	HY	0.669261		sesn RNAi	HY	0.986485		crc RNAi	HY	0.666427		sirt2 RNAi	HY	0.835473		Gal4R16D01	LY	0.70004		sesn RNAi	LY	0.655197		crc RNAi	LY	0.813433		sirt2 RNAi	LY	0.765028
Gal4R16D01	HY	0.822211		sesn RNAi	HY	1.05008		crc RNAi	HY	0.722473		sirt2 RNAi	HY	0.737468		Gal4R16D01	LY	0.78508		sesn RNAi	LY	0.852003		crc RNAi	LY	0.786098		sirt2 RNAi	LY	0.752051
Gal4R16D01	HY	0.61325		sesn RNAi	HY	0.754737		crc RNAi	HY	0.699496						Gal4R16D01	LY	0.632665		sesn RNAi	LY	0.74486		crc RNAi	LY	1.04739		sirt2 RNAi	LY	0.703851
Gal4R16D01	HY	0.719712		sesn RNAi	HY	1.03963										Gal4R16D01	LY	0.6937										sirt2 RNAi	LY	0.673664
Gal4R16D01	HY	0.608373		sesn RNAi	HY	0.75013										Gal4R16D01	LY	0.48291										sirt2 RNAi	LY	0.709413
Gal4R16D01	HY	0.752307														Gal4R16D01	LY	0.636131										sirt2 RNAi	LY	0.78934
Gal4R16D01	HY	0.664228														Gal4R16D01	LY	0.738352										sirt2 RNAi	LY	0.824234
Gal4R16D01	HY	0.680814
Gal4R16D01	HY	0.813678
mean		0.699808				0.757511				0.698662				0.766074				0.703266				0.783896				0.804416				0.770328
SD		0.0657555				0.187853				0.0557293				0.0426094				0.0885963				0.0901321				0.134976				0.0588386
n		18				14				12				11				16				12				12				16
sirt2	LY	0.759071
sirt2	LY	0.916003
sirt2	LY	0.768212
sirt2	LY	0.779768
sirt2	LY	0.754217
sirt2	LY	0.705396
sirt2	LY	0.803536
sirt2	LY	0.827182
sirt2	LY	0.794288
sirt2	LY	0.765028
sirt2	LY	0.752051
sirt2	LY	0.703851
sirt2	LY	0.673664
sirt2	LY	0.709413
sirt2	LY	0.78934
sirt2	LY	0.824234

## Sheet: S1-B
genotype	condition	normalized dendrite length		genotype	condition	normalized dendrite length		genotype	condition	normalized dendrite length		genotype	condition	normalized dendrite length
Gal4ppk	HY	31.3825		Gal4ppk	LY	37.4538		sirt2	HY	35.2656		sirt2	LY	41.5955
Gal4ppk	HY	27.362		Gal4ppk	LY	35.4277		sirt2	HY	33.9895		sirt2	LY	41.1538
Gal4ppk	HY	26.2214		Gal4ppk	LY	38.5294		sirt2	HY	37.3927		sirt2	LY	38.5254
Gal4ppk	HY	26.0391		Gal4ppk	LY	36.5598		sirt2	HY	39.3392		sirt2	LY	39.6981
Gal4ppk	HY	27.9828		Gal4ppk	LY	34.4439		sirt2	HY	36.4121		sirt2	LY	43.6514
Gal4ppk	HY	24.7119		Gal4ppk	LY	37.6776		sirt2	HY	37.2779		sirt2	LY	45.3839
Gal4ppk	HY	28.107		Gal4ppk	LY	36.6874		sirt2	HY	30.197		sirt2	LY	43.9012
Gal4ppk	HY	28.8293		Gal4ppk	LY	44.3331		sirt2	HY	31.5881		sirt2	LY	44.1681
Gal4ppk	HY	30.373		Gal4ppk	LY	37.7511		sirt2	HY	37.7304		sirt2	LY	49.7551
Gal4ppk	HY	23.1694		Gal4ppk	LY	39.8502		sirt2	HY	38.0949		sirt2	LY	41.7243
Gal4ppk	HY	30.2977		Gal4ppk	LY	36.8069		sirt2	HY	32.6866		sirt2	LY	41.5863
Gal4ppk	HY	26.7857		Gal4ppk	LY	35.2212		sirt2	HY	34.4496		sirt2	LY	39.0333
Gal4ppk	HY	24.9018		Gal4ppk	LY	32.8541		sirt2	HY	34.6068		sirt2	LY	37.9354
								sirt2	HY	26.1694		sirt2	LY	34.4065
								sirt2	HY	36.0222		sirt2	LY	47.695
								sirt2	HY	31.0586		sirt2	LY	43.9055
								sirt2	HY	30.6876		sirt2	LY	42.1324
mean		27.3972				37.1997				34.2922				42.1324
SD		2.43178				2.80825				3.49124				3.70726
n		13				13				18				18

## Sheet: S1-I
genotype	condition	normalized dendrite length		genotype	condition	normalized dendrite length		genotype	condition	normalized dendrite length		genotype	condition	normalized dendrite length		genotype	condition	normalized dendrite length		genotype	condition	normalized dendrite length
Gal4ppk	HY	31.5396		Rheb RNAi	HY	31.5258		slif RNAi	HY	16.7062		Gal4ppk	LY	44.4735		Rheb RNAi	LY	37.7005		slif RNAi	LY	9.58743
Gal4ppk	HY	28.7382		Rheb RNAi	HY	33.5895		slif RNAi	HY	17.0033		Gal4ppk	LY	42.1343		Rheb RNAi	LY	36.6858		slif RNAi	LY	8.24399
Gal4ppk	HY	27.1947		Rheb RNAi	HY	33.853		slif RNAi	HY	14.8613		Gal4ppk	LY	39.2713		Rheb RNAi	LY	35.2246		slif RNAi	LY	6.76616
Gal4ppk	HY	30.2561		Rheb RNAi	HY	31.7513		slif RNAi	HY	17.3484		Gal4ppk	LY	38.0767		Rheb RNAi	LY	36.3713		slif RNAi	LY	9.96274
Gal4ppk	HY	31.0871		Rheb RNAi	HY	28.6205		slif RNAi	HY	18.9165		Gal4ppk	LY	38.6845		Rheb RNAi	LY	37.8657		slif RNAi	LY	13.1966
Gal4ppk	HY	28.5		Rheb RNAi	HY	28.7001		slif RNAi	HY	15.5951		Gal4ppk	LY	40.9464		Rheb RNAi	LY	37.311		slif RNAi	LY	9.62882
Gal4ppk	HY	29.6332		Rheb RNAi	HY	34.9683		slif RNAi	HY	17.3779		Gal4ppk	LY	39.9098		Rheb RNAi	LY	38.5999		slif RNAi	LY	12.5692
Gal4ppk	HY	28.6827		Rheb RNAi	HY	37.4472		slif RNAi	HY	17.8082		Gal4ppk	LY	39.7539		Rheb RNAi	LY	28.4923		slif RNAi	LY	9.65294
Gal4ppk	HY	27.2362		Rheb RNAi	HY	28.9556		slif RNAi	HY	18.7356		Gal4ppk	LY	37.3736		Rheb RNAi	LY	33.7045		slif RNAi	LY	8.7874
Gal4ppk	HY	26.7242		Rheb RNAi	HY	30.615		slif RNAi	HY	18.3071		Gal4ppk	LY	47.7543		Rheb RNAi	LY	32.7023		slif RNAi	LY	9.89548
Gal4ppk	HY	26.8522		Rheb RNAi	HY	28.657		slif RNAi	HY	20.3362		Gal4ppk	LY	46.7101		Rheb RNAi	LY	36.8687		slif RNAi	LY	9.64429
Gal4ppk	HY	27.3655		Rheb RNAi	HY	32.5131		slif RNAi	HY	18.1854		Gal4ppk	LY	43.482		Rheb RNAi	LY	38.7029		slif RNAi	LY	13.9213
Gal4ppk	HY	29.031						slif RNAi	HY	13.8907		Gal4ppk	LY	39.6107		Rheb RNAi	LY	33.1809		slif RNAi	LY	14.9929
Gal4ppk	HY	26.4312						slif RNAi	HY	14.7995		Gal4ppk	LY	37.0804		Rheb RNAi	LY	35.1662		slif RNAi	LY	12.9291
																Rheb RNAi	LY	39.3628		slif RNAi	LY	9.09071
																Rheb RNAi	LY	41.0393		slif RNAi	LY	8.76815
																Rheb RNAi	LY	33.1917		slif RNAi	LY	11.0233
																Rheb RNAi	LY	37.456
																Rheb RNAi	LY	35.5358
																Rheb RNAi	LY	35.071
																Rheb RNAi	LY	39.9149
																Rheb RNAi	LY	42.1156
																Rheb RNAi	LY	37.0258
																Rheb RNAi	LY	39.4784
																Rheb RNAi	LY	34.6125
																Rheb RNAi	LY	37.547
mean		28.5194				31.7664				17.1337								36.5741				10.5094
SD		1.65026				2.8446				1.81322								2.93045				2.23974
n		14				12				14								26				17
							control
							control
							control
							control
							control
							control
							control
							control
							control
							control
							control
							control
							control
							control

## Sheet: S2-J
condition	tissue	intensity		condition	tissue	intensity		condition	tissue	intensity		condition	tissue	intensity
HY	epi	23.85		starva	epi	28.51		HY	c4	9.98		starva	c4	2.87
HY	epi	19.62		starva	epi	50.4		HY	c4	10.36		starva	c4	3.47
HY	epi	18.1		starva	epi	59.37		HY	c4	8.08		starva	c4	4.76
HY	epi	24.92		starva	epi	76.23		HY	c4	7.64		starva	c4	3.64
HY	epi	16.19		starva	epi	62.99		HY	c4	9.34		starva	c4	2.36
HY	epi	16.04		starva	epi	46.15		HY	c4	8.44		starva	c4	30.46
HY	epi	14.04		starva	epi	43.62		HY	c4	5.18		starva	c4	31.23
HY	epi	18.37		starva	epi	53.54		HY	c4	4.46		starva	c4	26.15
HY	epi	18.71		starva	epi	44.39		HY	c4	8.08		starva	c4	44.06
HY	epi	21.93		starva	epi	28.16		HY	c4	6		starva	c4	4.65
HY	epi	18.8		starva	epi	38.21		HY	c4	10.29		starva	c4	7.66
HY	epi	23.48						HY	c4	6.73		starva	c4	16.69
HY	epi	20.91						HY	c4	4.79
mean		19.6123				48.3245				7.64385				14.8333
SD		3.27838				14.4609				2.074				14.4867
n		13				12				13				12

## Sheet: S2-M
genotype	tissue	intensity		genotype	tissue	intensity		genotype	tissue	intensity		genotype	tissue	intensity
Gal4ppk	epi	15.106		slif RNAi	epi	71.27		Gal4ppk	c4	3.31		slif RNAi	c4	2.07
Gal4ppk	epi	19.591		slif RNAi	epi	77.85		Gal4ppk	c4	2.79		slif RNAi	c4	2.92
Gal4ppk	epi	18.161		slif RNAi	epi	60.27		Gal4ppk	c4	2.82		slif RNAi	c4	2.32
Gal4ppk	epi	20.28		slif RNAi	epi	73.25		Gal4ppk	c4	2.07		slif RNAi	c4	2.76
Gal4ppk	epi	21.723		slif RNAi	epi	62.36		Gal4ppk	c4	2.68		slif RNAi	c4	2.18
Gal4ppk	epi	15.262		slif RNAi	epi	68.01		Gal4ppk	c4	1.99		slif RNAi	c4	1.91
Gal4ppk	epi	15.912		slif RNAi	epi	44.25		Gal4ppk	c4	2.88		slif RNAi	c4	4.94
Gal4ppk	epi	20.15		slif RNAi	epi	56.66		Gal4ppk	c4	2.84		slif RNAi	c4	8.21
Gal4ppk	epi	20.371		slif RNAi	epi	64.48		Gal4ppk	c4	2.67		slif RNAi	c4	3.02
Gal4ppk	epi	17.589		slif RNAi	epi	68.9		Gal4ppk	c4	2.74		slif RNAi	c4	2.77
Gal4ppk	epi	20.93		slif RNAi	epi	53.63		Gal4ppk	c4	2.08		slif RNAi	c4	1.75
Gal4ppk	epi	17.966		slif RNAi	epi	69.25		Gal4ppk	c4	1.74		slif RNAi	c4	2.06
Gal4ppk	epi	15.704		slif RNAi	epi	44.9		Gal4ppk	c4	1.78		slif RNAi	c4	1.44
				slif RNAi	epi	73						slif RNAi	c4	1.74
				slif RNAi	epi	63.58						slif RNAi	c4	1.94
mean		18.365				63.444				2.49154				2.802
SD		2.31637				10.0269				0.494804				1.7158
n		13				15				13				15

[truncated: 1 more sheets: S3-F]
