# Supplementary material for: Low FoxO expression in Drosophila somatosensory neurons protects dendrite growth under nutrient restriction
Source: eLife. 2020 May 19;9:e53351. doi: 10.7554/eLife.53351 (PMC7308081; doi:10.7554/eLife.53351)
Supplement: Figure 5—source data 1. [file elife-53351-fig5-data1.xlsx]

## Sheet: fig 5-CD
genotype	tissue	condition	value		genotype	tissue	condition	value		genotype	tissue	condition	value		genotype	tissue	condition	value		tissue	condition	value		tissue	condition	value		tissue	condition	value		tissue	condition	value
control	dendrite	LY	1.42714		control	dendrite	HY	0.257698		foxo OE	dendrite	HY	0.309916		foxo OE	dendrite	LY	0.860056		control	LY	1.41187		control	HY	0.226349		foxo OE	HY	0.413942		foxo OE	LY	1.19263
control	dendrite	LY	1.4291		control	dendrite	HY	0.302603		foxo OE	dendrite	HY	0.460955		foxo OE	dendrite	LY	0.542298		control	LY	1.31403		control	HY	0.367484		foxo OE	HY	0.982772		foxo OE	LY	1.4486
control	dendrite	LY	1.48745		control	dendrite	HY	0.368955		foxo OE	dendrite	HY	0.519968		foxo OE	dendrite	LY	0.709567		control	LY	1.21923		control	HY	0.438361		foxo OE	HY	0.230086		foxo OE	LY	3.57787
control	dendrite	LY	1.22331		control	dendrite	HY	0.923389		foxo OE	dendrite	HY	0.106283		foxo OE	dendrite	LY	0.719852		control	LY	1.89016		control	HY	0.421034		foxo OE	HY	0.119404		foxo OE	LY	1.19234
control	dendrite	LY	1.0327		control	dendrite	HY	0.05612		foxo OE	dendrite	HY	0.407858		foxo OE	dendrite	LY	0.677525		control	LY	0.824394		control	HY	0.0987385		foxo OE	HY	0.371815		foxo OE	LY	0.750723
control	dendrite	LY	1.6411		control	dendrite	HY	0.554202		foxo OE	dendrite	HY	0.181096		foxo OE	dendrite	LY	0.682926		control	LY	0.875015		control	HY	0.139326		foxo OE	HY	0.143799		foxo OE	LY	1.52301
control	dendrite	LY	1.37081		control	dendrite	HY	0.09201		foxo OE	dendrite	HY	0.499758		foxo OE	dendrite	LY	0.59531		control	LY	1.3299		control	HY	0.53101		foxo OE	HY	0.258221		foxo OE	LY	1.68192
control	dendrite	LY	1.61601		control	dendrite	HY	0.259368		foxo OE	dendrite	HY	0.437404		foxo OE	dendrite	LY	1.04405		control	LY	2.41431		control	HY	0.134678		foxo OE	HY	0.753864		foxo OE	LY	2.9052
control	dendrite	LY	1.71325		control	dendrite	HY	0.0668441		foxo OE	dendrite	HY	0.232247		foxo OE	dendrite	LY	0.274023		control	LY	1.12914		control	HY	0.171155		foxo OE	HY	0.320271		foxo OE	LY	0.704111
control	dendrite	LY	1.55404		control	dendrite	HY	0.171193		foxo OE	dendrite	HY	0.556793		foxo OE	dendrite	LY	0.252369		control	LY	1.60471		control	HY	0.325452		foxo OE	HY	0.387636		foxo OE	LY	0.457379
control	dendrite	LY	1.31625		control	dendrite	HY	0.152015		foxo OE	dendrite	HY	0.327008		foxo OE	dendrite	LY	0.304205		control	LY	1.14062		control	HY	0.153938		foxo OE	HY	0.121438		foxo OE	LY	0.60588
control	dendrite	LY	0.867987		control	dendrite	HY	0.467741		foxo OE	dendrite	HY	0.938748		foxo OE	dendrite	LY	1.03259		control	LY	0.874116		control	HY	0.45667		foxo OE	HY	0.120644		foxo OE	LY	2.93334
control	dendrite	LY	1.79774		control	dendrite	HY	0.442458		foxo OE	dendrite	HY	0.366249		foxo OE	dendrite	LY	0.827579		control	LY	1.57992		control	HY	0.462632		foxo OE	HY	0.25385		foxo OE	LY	1.37353
control	dendrite	LY	1.12104		control	dendrite	HY	0.263847		foxo OE	dendrite	HY	0.389323		foxo OE	dendrite	LY	0.893579		control	LY	1.6041		control	HY	0.727328		foxo OE	HY	0.198093		foxo OE	LY	2.14033
control	dendrite	LY	1.79671		control	dendrite	HY	0.311854		foxo OE	dendrite	HY	0.306134		foxo OE	dendrite	LY	1.10727		control	LY	2.09384		control	HY	0.406656		foxo OE	HY	0.160383		foxo OE	LY	0.926542
control	dendrite	LY	1.60756		control	dendrite	HY	0.200168		foxo OE	dendrite	HY	0.300439		foxo OE	dendrite	LY	0.66814		control	LY	1.86904		control	HY	0.0826233		foxo OE	HY	0.144515		foxo OE	LY	1.43506
control	dendrite	LY	1.04969		control	dendrite	HY	0.0952233		foxo OE	dendrite	HY	0.269753							control	LY	0.912617		control	HY	0.0463416		foxo OE	HY	0.161662
control	dendrite	LY	1.29833																	control	LY	2.14455
control	dendrite	LY	2.46195																	control	LY	1.82363
control	dendrite	LY	1.17116																	control	LY	3.34593
mean			1.44917					0.293276					0.38882					0.699459				1.57006				0.305281				0.302494				1.55303
SD			0.354979					0.217663					0.186236					0.26468				0.621344				0.191291				0.237344				0.908019
n			20					17					17					16				20				17				17				16

## Sheet: fig 5-G
genotype	condition	intensity		genotype	condition	intensity		genotype	condition	intensity		genotype	condition	intensity
control	HY	1.21804		control	LY	0.944314		foxo OE	HY	0.731765		foxo OE	LY	7.64902
control	HY	1.55451		control	LY	1.27333		foxo OE	HY	1.21294		foxo OE	LY	8.45451
control	HY	1.35961		control	LY	0.896863		foxo OE	HY	1.37725		foxo OE	LY	11.7141
control	HY	0.813725		control	LY	0.983137		foxo OE	HY	0.184314		foxo OE	LY	6.67216
control	HY	0.978431		control	LY	1.58196		foxo OE	HY	0.218824		foxo OE	LY	5.91686
control	HY	0.270196		control	LY	2.70902		foxo OE	HY	0.0917647		foxo OE	LY	4.33451
control	HY	0.921961		control	LY	0.563529		foxo OE	HY	0.692549		foxo OE	LY	3.67882
control	HY	2.74588		control	LY	1.05098		foxo OE	HY	1.03059		foxo OE	LY	9.88275
control	HY	2.0098		control	LY	2.43725		foxo OE	HY	0.77098		foxo OE	LY	9.37451
control	HY	2.0502		control	LY	3.35608		foxo OE	HY	0.558431		foxo OE	LY	6.63098
control	HY	1.64431		control	LY	1.33882		foxo OE	HY	0.292549		foxo OE	LY	13.2573
control	HY	1.90353		control	LY	1.95882		foxo OE	HY	0.796078		foxo OE	LY	9.92039
				control	LY	4.01843		foxo OE	HY	0.721569		foxo OE	LY	9.05882
								foxo OE	HY	0.851373		foxo OE	LY	9.40392
								foxo OE	HY	0.863529		foxo OE	LY	8.43529
								foxo OE	HY	0.137255		foxo OE	LY	8.88902
								foxo OE	HY	2.55294		foxo OE	LY	5.74745
								foxo OE	HY	2.37255		foxo OE	LY	5.94118
								foxo OE	HY	1.27059		foxo OE	LY	4.63333
								foxo OE	HY	1.09412
								foxo OE	HY	0.854902
								foxo OE	HY	1.21569
								foxo OE	HY	0.960784
								foxo OE	HY	1.05882
mean		1.45585				1.77789				0.913007				7.87342
SD		0.671961				1.05817				0.603474				2.53185
n		12				13				24				19
