# Supplementary material for: Low FoxO expression in Drosophila somatosensory neurons protects dendrite growth under nutrient restriction
Source: eLife. 2020 May 19;9:e53351. doi: 10.7554/eLife.53351 (PMC7308081; doi:10.7554/eLife.53351)
Supplement: Figure 6—source data 1. [file elife-53351-fig6-data1.xlsx]

## Sheet: Sheet1
1st	w1118_ 1%_third instar										2nd											3rd
	39C	40C	41C	42C	43C	44C	45C	46C	47C			39C	40C	41C	42C	43C	44C	45C	46C	47C			39C	40C	41C	42C	43C	44C	45C	46C	47C
L1	>20	15	6	4	2	5	2	2	5		L22	>20	>20	7	6	2	1	1	1	1		L22	>20	>20	8	4	3	2	1	1	1
L10	>20	>20	8	6	4	3	4	4	4		L15	>20	>20	9	7	3	3	2	2	1		L15	>20	>20	8	4	3	2	1	1	1
L11	>20	>20	10	7	5	6	4	5	4		L21	>20	>20	9	7	3	3	2	2	1		L21	>20	>20	10	5	6	3	2	1	1
L12	>20	>20	10	8	6	15	4	6	3		L9	>20	>20	11	7	5	5	3	2	1		L9	>20	>20	14	7	7	5	2	2	1
L13	>20	>20	11	10	6	6	4	1	2		L10	>20	>20	13	8	5	5	3	2	1		L10	>20	>20	14	7	7	5	2	2	1
L14	>20	>20	11	10	7	8	5	2	3		L14	>20	18	13	9	6	5	3	2	1		L14	>20	>20	16	7	7	5	2	2	1
L15	>20	>20	13	14	9	10	5	6	4		L3	>20	>20	14	9	7	6	4	3	1		L3	>20	>20	17	9	8	6	3	2	1
L16	>20	>20	17	14	9	13	5	1	3		L30	>20	>20	15	10	7	6	4	3	1		L30	>20	>20	18	10	8	7	3	2	2
L17	>20	>20	19	15	10	9	5	5	2		L2	>20	>20	16	10	7	6	4	3	2		L2	>20	>20	18	11	9	8	3	2	2
L18	>20	>20	>20	16	11	15	5	7	4		L7	>20	>20	17	11	7	7	4	3	2		L7	>20	>20	19	11	9	8	4	3	2
L19	>20	>20	>20	17	11	4	6	4	3		L6	>20	>20	17	13	9	8	4	3	2		L6	>20	19	19	13	9	8	4	3	2
L2	>20	>20	>20	17	11	9	6	4	1		L4	>20	>20	19	13	10	10	5	3	2		L4	>20	>20	>20	13	10	9	4	3	2
L20	>20	>20	>20	17	12	15	7	5	3		L16	>20	>20	>20	15	10	10	5	3	3		L16	>20	>20	>20	13	10	9	5	3	2
L21	>20	>20	>20	18	12	3	7	2	3		L12	>20	>20	>20	15	11	10	5	4	3		L12	>20	>20	>20	13	12	9	5	4	2
L22	>20	12	>20	18	13	12	7	2	3		L1	>20	>20	>20	15	12	10	7	4	3		L1	>20	>20	>20	14	13	9	6	4	2
L23	>20	>20	>20	19	13	6	8	4	4		L26	>20	>20	>20	16	12	10	7	4	3		L26	>20	>20	>20	16	14	10	6	4	2
L24	>20	>20	>20	19	13	7	8	6	2		L24	>20	>20	>20	18	15	11	8	4	3		L24	>20	>20	>20	16	14	11	7	4	2
L25	>20	>20	>20	>20	14	4	8	3	1		L19	>20	>20	>20	18	15	12	9	4	3		L19	>20	>20	>20	19	16	12	9	5	2
L26	>20	>20	>20	>20	16	7	10	3	3		L17	>20	>20	>20	18	16	12	9	5	3		L17	>20	>20	>20	>20	16	12	9	5	3
L27	>20	>20	>20	>20	16	7	10	4	3		L27	>20	>20	>20	19	16	12	11	5	3		L27	>20	13	>20	>20	16	13	9	5	3
L28	>20	>20	>20	>20	18	8	10	5	2		L29	>20	>20	>20	>20	18	13	13	5	3		L29	>20	>20	>20	>20	18	14	9	5	3
L29	>20	>20	>20	>20	18	10	10	3	1		L23	>20	>20	>20	>20	18	13	13	5	4		L23	>20	>20	>20	>20	19	14	9	5	3
L3	>20	>20	>20	>20	19	10	11	4	4		L28	>20	>20	>20	>20	19	14	13	5	4		L28	>20	>20	>20	>20	>20	16	10	5	3
L30	>20	>20	>20	>20	>20	11	11	1	3		L18	>20	>20	>20	>20	19	15	14	6	4		L18	>20	>20	>20	>20	>20	17	13	5	4
L4	>20	>20	>20	>20	>20	12	11	3	5		L5	>20	>20	>20	>20	19	15	15	6	4		L5	>20	>20	>20	>20	>20	17	13	6	4
L5	>20	>20	>20	>20	>20	12	13	8	2		L8	>20	>20	>20	>20	>20	15	15	6	4		L8	>20	>20	>20	>20	>20	17	15	6	4
L6	>20	>20	>20	>20	>20	15	14	4	3		L20	>20	>20	>20	>20	>20	16	15	6	4		L20	>20	>20	>20	>20	>20	18	15	6	5
L7	>20	>20	>20	>20	>20	19	14	6	4		L13	>20	>20	>20	>20	>20	16	15	8	5		L13	>20	>20	>20	>20	>20	19	16	6	5
L8	>20	>20	>20	>20	>20	>20	15	6	3		L25	>20	>20	>20	>20	>20	17	18	8	5		L25	>20	>20	>20	>20	>20	19	16	7	5
L9	>20	>20	>20	>20	>20	>20	17	8	4		L11	>20	>20	>20	>20	>20	18	18	10	5		L11	>20	>20	>20	>20	>20	>20	16	9	6
w111_ 8%_third instar
1st											2nd											3rd
	41C	42C	43C	44C	45C	46C	47C	48C	49C			41C	42C	43C	44C	45C	46C	47C	48C	49C			41C	42C	43C	44C	45C	46C	47C	48C	49C
L1	>20	>20	>20	4	2	9	4	11	2		L1	>20	17	4	3	2	2	2	1	1		L1	>20	>20	5	2	2	2	1	1	1
L10	>20	>20	19	4	3	19	12	5	3		L10	>20	>20	6	3	2	2	3	1	1		L10	>20	>20	5	2	3	3	2	1	1
L11	>20	>20	17	6	4	11	10	7	1		L11	>20	>20	8	5	3	3	3	1	1		L11	>20	>20	6	4	3	3	2	2	1
L12	>20	>20	15	6	4	17	12	4	5		L12	>20	>20	9	7	3	3	3	2	1		L12	>20	>20	7	5	5	3	3	2	1
L13	>20	>20	15	6	4	16	5	8	5		L13	>20	>20	10	8	5	3	5	2	1		L13	>20	>20	10	5	5	4	3	2	1
L14	>20	>20	13	8	5	5	7	4	5		L14	>20	>20	13	10	5	4	5	2	2		L14	>20	>20	12	6	5	4	4	2	2
L15	>20	>20	12	8	6	8	10	3	1		L15	>20	>20	15	11	6	5	5	3	2		L15	>20	>20	12	7	6	5	4	2	2
L16	>20	>20	10	8	7	8	5	7	4		L16	>20	>20	16	13	8	5	6	3	2		L16	>20	>20	13	9	6	6	5	3	2
L17	>20	>20	7	8	8	5	7	3	2		L17	>20	>20	17	15	9	6	6	3	2		L17	>20	>20	13	9	8	6	5	3	2
L18	>20	>20	5	11	8	10	4	4	4		L18	>20	>20	17	15	10	6	7	4	2		L18	>20	>20	15	10	8	6	6	3	2
L19	>20	>20	>20	12	9	7	5	2	2		L19	>20	>20	18	16	13	7	8	4	2		L19	>20	>20	16	11	9	7	6	3	3
L2	>20	>20	>20	13	9	8	11	5	3		L2	>20	>20	18	16	13	8	8	5	2		L2	>20	>20	17	15	9	7	7	3	3
L20	>20	>20	>20	16	12	5	8	10	3		L20	>20	>20	>20	16	14	8	8	5	2		L20	>20	>20	18	15	10	8	7	4	3
L21	>20	>20	>20	17	12	14	4	5	4		L21	>20	>20	>20	17	14	8	8	5	2		L21	>20	>20	19	16	11	9	8	4	3
L22	>20	>20	>20	17	13	12	10	2	5		L22	>20	>20	>20	17	15	8	9	6	3		L22	>20	>20	>20	17	15	9	9	4	3
L23	>20	>20	>20	18	13	6	8	12	2		L23	>20	>20	>20	18	16	10	10	7	3		L23	>20	>20	>20	18	15	9	10	4	3
L24	>20	>20	>20	19	14	6	4	3	4		L24	>20	>20	>20	19	16	10	11	7	3		L24	>20	>20	>20	19	16	10	10	5	4
L25	>20	>20	>20	>20	15	8	6	6	1		L25	>20	>20	>20	>20	17	11	12	8	3		L25	>20	>20	>20	19	18	12	12	7	4
L26	>20	>20	>20	>20	15	7	9	9	5		L26	>20	>20	>20	>20	18	14	15	8	3		L26	>20	>20	>20	>20	18	12	13	6	4
L27	>20	>20	>20	>20	17	17	11	2	2		L27	>20	>20	>20	>20	18	15	15	8	3		L27	>20	>20	>20	>20	>20	13	14	6	4
L28	>20	15	>20	>20	17	7	5	2	3		L28	>20	>20	>20	>20	19	15	15	9	3		L28	>20	>20	>20	>20	>20	15	14	8	4
L29	>20	>20	>20	>20	19	8	5	3	4		L29	>20	>20	>20	>20	>20	16	16	9	4		L29	>20	>20	>20	>20	>20	15	15	8	4
L3	>20	>20	>20	>20	>20	13	3	3	2		L3	>20	>20	>20	>20	>20	17	16	10	4		L3	>20	>20	>20	>20	>20	16	16	9	4
L30	>20	>20	>20	>20	>20	11	7	10	2		L30	>20	>20	>20	>20	>20	18	16	10	4		L30	>20	>20	>20	>20	>20	17	17	9	5
L4	>20	>20	>20	>20	>20	12	14	3	3		L4	>20	>20	>20	>20	>20	18	16	11	4		L4	>20	>20	>20	>20	>20	18	17	10	5
L5	>20	>20	>20	>20	>20	>20	15	3	5		L5	>20	>20	>20	>20	>20	18	17	11	4		L5	>20	>20	>20	>20	>20	18	18	10	5
L6	>20	>20	>20	>20	>20	15	5	6	2		L6	>20	>20	>20	>20	>20	19	17	11	4		L6	>20	>20	>20	>20	>20	19	18	11	5
L7	>20	11	>20	>20	>20	15	11	10	2		L7	>20	>20	>20	>20	>20	>20	18	12	4		L7	>20	>20	>20	>20	>20	19	19	12	5
L8	>20	>20	>20	>20	>20	12	8	6	3		L8	>20	>20	>20	>20	>20	>20	18	13	4		L8	>20	>20	>20	>20	>20	>20	19	13	6
L9	>20	>20	>20	>20	>20	12	14	6	4		L9	>20	>20	>20	>20	>20	>20	19	13	5		L9	>20	>20	>20	>20	>20	>20	>20	15	6
0.08	46C
ppk-Gal4	1st	2nd	3rd	4st		foxo RNAi	1st	2nd	3rd
L1	1	2	1	1		L1	3	2	1
L2	3	2	1	1		L2	4	2	2
L3	3	2	2	2		L3	4	3	3
L4	4	3	2	2		L4	4	3	4
L5	4	3	3	3		L5	4	3	4
L6	5	3	3	4		L6	4	4	5
L7	5	4	3	4		L7	4	4	5
L8	5	4	4	4		L8	4	4	6
L9	6	4	4	5		L9	4	5	6
L10	6	4	5	6		L10	5	6	7
L11	7	4	5	6		L11	5	6	7
L12	7	5	6	6		L12	6	6	7
L13	8	5	6	6		L13	6	6	7
L14	8	5	6	7		L14	6	6	7
L15	9	6	6	7		L15	6	7	7
L16	9	6	7	7		L16	7	7	8
L17	9	6	7	8		L17	7	7	8
L18	9	6	7	8		L18	7	8	9
L19	10	6	8	9		L19	8	9	9
L20	10	7	8	9		L20	8	9	10
L21	10	7	8	10		L21	10	11	10
L22	11	7	10	10		L22	11	11	11
L23	12	7	11	10		L23	12	11	13
L24	12	8	11	11		L24	13	13	14
L25	16	8	13	11		L25	15	15	14
L26	18	12	15	14		L26	18	16	16
L27	>20	17	16	>20		L27	19	>20	17
L28	>20	19	18	>20		L28	>20	>20	19
L29	>20	>20	>20	>20		L29	>20	>20	>20
L30	>20	>20	>20	>20		L30	>20	>20	>20
0.01	46C
ppk-Gal4	1st	2nd	3rd			foxo RNAi	1st	2nd	3rd	4st
L1	1	1	1			L1	1	1	1	1
L2	1	1	1			L2	1	1	1	1
L3	1	1	1			L3	1	1	1	1
L4	2	1	1			L4	2	2	2	1
L5	2	1	2			L5	2	2	2	2
L6	2	2	2			L6	2	2	2	2
L7	2	2	2			L7	2	2	2	2
L8	3	2	2			L8	2	2	3	3
L9	3	2	3			L9	3	2	3	3
L10	4	2	3			L10	3	2	3	3
L11	4	3	3			L11	3	3	3	4
L12	4	3	3			L12	3	4	4	4
L13	4	3	3			L13	3	4	4	4
L14	4	3	3			L14	4	4	4	4
L15	4	3	3			L15	4	4	4	4
L16	4	3	4			L16	5	4	5	4
L17	5	3	4			L17	5	6	5	5
L18	5	3	4			L18	5	6	6	5
L19	5	4	4			L19	6	7	6	5
L20	5	4	4			L20	6	8	7	6
L21	6	4	4			L21	7	8	7	6
L22	6	4	4			L22	7	9	8	7
L23	6	4	5			L23	7	11	8	8
L24	7	5	5			L24	8	12	9	9
L25	7	6	5			L25	8	14	14	9
L26	7	6	6			L26	9	17	14	10
L27	8	7	6			L27	12	>20	15	15
L28	8	9	6			L28	13	>20	17	>20
L29	10	10	7			L29	>20	>20	>20	>20
L30	11	12	10			L30	>20	>20	>20	>20
