# Supplementary material for: Low FoxO expression in Drosophila somatosensory neurons protects dendrite growth under nutrient restriction
Source: eLife. 2020 May 19;9:e53351. doi: 10.7554/eLife.53351 (PMC7308081; doi:10.7554/eLife.53351)
Supplement: Figure 7—source data 1. [file elife-53351-fig7-data1.xlsx]

## Sheet: fig7-C
tissue	condition	Total length		tissue	condition	Total length
ddaE	HY	1818.46		ddaE	LY	1750.06
ddaE	HY	1561.05		ddaE	LY	1590.26
ddaE	HY	1704.89		ddaE	LY	1597.19
ddaE	HY	1819.79		ddaE	LY	1453.52
ddaE	HY	1798.95		ddaE	LY	1536.26
ddaE	HY	1586.46		ddaE	LY	1772.54
ddaE	HY	1535.81		ddaE	LY	1740.01
ddaE	HY	1766.58		ddaE	LY	1640.13
ddaE	HY	1583.83		ddaE	LY	1513.81
ddaE	HY	1470.05		ddaE	LY	1456.44
ddaE	HY	1655.62		ddaE	LY	1543.94
ddaE	HY	1732.55		ddaE	LY	1760.8
ddaE	HY	1681.95		ddaE	LY	1391.65
ddaE	HY	1659.54		ddaE	LY	1287.01
ddaE	HY	1632.41
ddaE	HY	1547.65
ddaE	HY	1481.78
ddaE	HY	1591.08
ddaE	HY	1609.18
ddaE	HY	1501.76
mean		1636.97				1573.83
SD		109.664				148.827
n		20				14

## Sheet: fig7-FGH
tissue	condition	Total length ROI	Term length ROI	Term # ROI		tissue	condition	Total length ROI	Term length ROI	Term # ROI		tissue	condition	Total length ROI	Term length ROI	Term # ROI		tissue	condition	Total length ROI	Term length ROI	Term # ROI
ddaA	HY	4167.09	1446.33	295		ddaA	LY	5680.38	2505.36	414		ddaF	HY	4678.15	1428.69	179		ddaF	LY	5777.18	2141.5	307
ddaA	HY	4468.85	1743.2	291		ddaA	LY	5677.78	2360.86	364		ddaF	HY	4257.22	1441.46	210		ddaF	LY	5733.66	2197.07	259
ddaA	HY	3410.93	1171.35	226		ddaA	LY	5620.35	2407.61	370		ddaF	HY	4436.71	1391.95	160		ddaF	LY	5932.82	2270.2	275
ddaA	HY	3390.84	1268.76	213		ddaA	LY	5423.46	2328.62	409		ddaF	HY	4235.07	1409.19	177		ddaF	LY	4831.05	1804.04	234
ddaA	HY	3708.21	1436.7	237		ddaA	LY	6318.48	2733.45	444		ddaF	HY	3951.08	1298.28	171		ddaF	LY	5330.59	1777.36	276
ddaA	HY	3939.73	1576.89	276		ddaA	LY	5779.91	2483.38	426		ddaF	HY	4518.4	1503.29	193		ddaF	LY	6107.46	2395.37	335
ddaA	HY	3617.32	1141.86	232		ddaA	LY	6083.82	2662.66	461		ddaF	HY	4686.33	1574	238		ddaF	LY	6209.44	2401.91	343
ddaA	HY	3817.96	1267.65	245		ddaA	LY	4275.86	1608.31	287		ddaF	HY	3871.09	1230.23	171		ddaF	LY	5285.46	1829.67	281
ddaA	HY	3541.85	1404.07	243		ddaA	LY	4847.39	2029.14	365		ddaF	HY	3722.01	1252.3	123		ddaF	LY	5346.74	1803.6	223
ddaA	HY	3553.24	1363.45	254		ddaA	LY	5634.02	2531.83	390		ddaF	HY	3937.08	1388.57	120		ddaF	LY	5641.37	1900.76	285
ddaA	HY	3480.95	1316.82	237		ddaA	LY	5219.03	2268.21	338		ddaF	HY	4232.56	1290.1	186		ddaF	LY	5979.42	1982.18	238
ddaA	HY	3529.13	1273.69	246		ddaA	LY	3741.06	1484.24	258		ddaF	HY	3802.5	1326.64	149		ddaF	LY	4733.61	1676.93	226
ddaA	HY	4439.35	1651.86	282		ddaA	LY	4849.83	2052.57	324		ddaF	HY	4286.98	1347.16	165		ddaF	LY	5024.69	1911.62	263
ddaA	HY	3970.54	1626.51	261								ddaF	HY	4056.51	1390.18	168
mean		3788.28	1406.37	252.714				5319.34	2265.87	373.077				4190.84	1376.57	172.143				5533.35	2007.09	272.692
SD		361.746	184.938	25.0182				723.831	379.626	60.0423				313.889	95.0373	30.8292				481.788	246.13	38.5906
n		14	14	14				13	13	13				14	14	14				13	13	13

## Sheet: fig7-M
tissue	condition	% area		tissue	condition	% area		tissue	condition	% area		tissue	condition	% area		tissue	condition	% area		tissue	condition	% area		tissue	condition	% area		tissue	condition	% area
ddaE	HY	3.85098		ddaE	LY	9.21961		ddaA	HY	2.11373		ddaA	LY	1.4		ddaF	HY	2.55294		ddaF	LY	0.517647		epi	HY	1.50065		epi	LY	10.2183
ddaE	HY	5.25098		ddaE	LY	10.4706		ddaA	HY	2.41176		ddaA	LY	5.61176		ddaF	HY	2.29804		ddaF	LY	0.0313725		epi	HY	3.22484		epi	LY	13.4471
ddaE	HY	4.72549		ddaE	LY	3.4902		ddaA	HY	1.78431		ddaA	LY	0.345098		ddaF	HY	3.12941		ddaF	LY	1.82745		epi	HY	2.16863		epi	LY	14.4196
ddaE	HY	4.31373		ddaE	LY	5.90588		ddaA	HY	0.921569		ddaA	LY	2.34902		ddaF	HY	2.1451		ddaF	LY	3.41176		epi	HY	2.63922		epi	LY	9.39608
ddaE	HY	4.86275		ddaE	LY	3.45882		ddaA	HY	1.07059		ddaA	LY	1.39216		ddaF	HY	0.823529		ddaF	LY	5.01176		epi	HY	1.44967		epi	LY	10.2078
ddaE	HY	4.98431		ddaE	LY	2.56863		ddaA	HY	2.46667		ddaA	LY	1.60784		ddaF	HY	1.26275		ddaF	LY	1.05098		epi	HY	3.03529		epi	LY	14.2458
ddaE	HY	5.49804		ddaE	LY	5.06275		ddaA	HY	4.52941		ddaA	LY	4.76471		ddaF	HY	7.33333		ddaF	LY	1.67843		epi	HY	3.70458		epi	LY	13.1922
ddaE	HY	5.07843		ddaE	LY	3.85882		ddaA	HY	1.63137		ddaA	LY	1.46667		ddaF	HY	2.66275		ddaF	LY	3.6		epi	HY	2.96732		epi	LY	16.6222
ddaE	HY	4.75686		ddaE	LY	5.58824		ddaA	HY	0.862745		ddaA	LY	2.10588		ddaF	HY	0.85098		ddaF	LY	1.18824		epi	HY	6.78039		epi	LY	13.5686
ddaE	HY	5.96471		ddaE	LY	10.6941		ddaA	HY	0.737255		ddaA	LY	3.82745		ddaF	HY	2.24706		ddaF	LY	6.48235		epi	HY	2.34248		epi	LY	18.9255
ddaE	HY	5.88627		ddaE	LY	9.04706		ddaA	HY	1.01961		ddaA	LY	1.22353		ddaF	HY	2.61961		ddaF	LY	2.7451		epi	HY	2.02353		epi	LY	16.7542
ddaE	HY	4.08235		ddaE	LY	5.3098		ddaA	HY	2.06275						ddaF	HY	2.64314		ddaF	LY	5.98431		epi	HY	3.62745		epi	LY	6.95163
ddaE	HY	5.9451		ddaE	LY	5.22353		ddaA	HY	4.41176						ddaF	HY	1.75294		ddaF	LY	2.73333		epi	HY	10.3948		epi	LY	5.93595
ddaE	HY	3.74118		ddaE	LY	2.96078														ddaF	LY	3.93333		epi	HY	5.48627		epi	LY	7.96471
ddaE	HY	4.5451		ddaE	LY	5.52157														ddaF	LY	8.24706		epi	HY	5.4549		epi	LY	7.15294
				ddaE	LY	4.83137														ddaF	LY	12.6078						epi	LY	6.80261
				ddaE	LY	6.57255														ddaF	LY	4.02745						epi	LY	6.88497
				ddaE	LY	8.39216														ddaF	LY	6.96471						epi	LY	10.3059
				ddaE	LY	7.43529														ddaF	LY	3.10588						epi	LY	7.85621
				ddaE	LY	12.4902														ddaF	LY	6.06667						epi	LY	8.30458
mean		4.89908				6.4051				2.00181				2.37219				2.48627				4.06078				3.78667				10.9578
SD		0.724677				2.81636				1.24756				1.64762				1.62451				3.03767				2.38599				3.90114
n		15				20				13				11				13				20				15				20

## Sheet: fig7-R
tissue	condition	% area		tissue	condition	% area		tissue	condition	% area		tissue	condition	% area		tissue	condition	% area		tissue	condition	% area		tissue	condition	% area		tissue	condition	% area
ddae	HY	2.04314		ddae	LY	5.36863		ddaa	HY	0		ddaa	LY	0.0627451		ddaf	HY	0		ddaf	LY	0.517647		epi	HY	0.643137		epi	LY	5.20915
ddae	HY	2.2902		ddae	LY	5.02745		ddaa	HY	0		ddaa	LY	0		ddaf	HY	0		ddaf	LY	0.0313725		epi	HY	0.508497		epi	LY	5.76601
ddae	HY	1.97647		ddae	LY	4.59608		ddaa	HY	0		ddaa	LY	0		ddaf	HY	0		ddaf	LY	0.207843		epi	HY	0.688889		epi	LY	4.16601
ddae	HY	2.20784		ddae	LY	5.99608		ddaa	HY	0.0784314		ddaa	LY	0.0941176		ddaf	HY	0		ddaf	LY	0.188235		epi	HY	0.381699		epi	LY	5.5451
ddae	HY	2.51373		ddae	LY	4.34902		ddaa	HY	0.0588235		ddaa	LY	0.0588235		ddaf	HY	0.0823529		ddaf	LY	0.113725		epi	HY	1.22876		epi	LY	4.58693
ddae	HY	1.78824		ddae	LY	5.31373		ddaa	HY	0		ddaa	LY	0		ddaf	HY	0.376471		ddaf	LY	0.301961		epi	HY	0.487582		epi	LY	5.11634
ddae	HY	1.62745		ddae	LY	5.86275		ddaa	HY	0.117647		ddaa	LY	0.564706		ddaf	HY	0		ddaf	LY	0.509804		epi	HY	0.377778		epi	LY	6.45229
ddae	HY	1.57647		ddae	LY	5.17255		ddaa	HY	0		ddaa	LY	0.0666667		ddaf	HY	0		ddaf	LY	0.988235		epi	HY	0.983007		epi	LY	5.74771
ddae	HY	1.76078		ddae	LY	5.01961		ddaa	HY	0		ddaa	LY	0		ddaf	HY	0.411765		ddaf	LY	0.372549		epi	HY	1.43399		epi	LY	7.33725
ddae	HY	2.18431		ddae	LY	4.52157		ddaa	HY	0		ddaa	LY	0.462745		ddaf	HY	0		ddaf	LY	0		epi	HY	1.03007		epi	LY	9.61438
ddae	HY	1.35686		ddae	LY	4.21961		ddaa	HY	0.0235294		ddaa	LY	0		ddaf	HY	0.0666667		ddaf	LY	0.227451		epi	HY	1.00915		epi	LY	7.23791
ddae	HY	3.33333		ddae	LY	3.22745		ddaa	HY	0		ddaa	LY	0.027451		ddaf	HY	0.0588235		ddaf	LY	0.847059		epi	HY	1.6366		epi	LY	5.97516
ddae	HY	1.53333		ddae	LY	7.70588						ddaa	LY	0.313725		ddaf	HY	0		ddaf	LY	1.57647		epi	HY	1.57647		epi	LY	5.98824
ddae	HY	1.03922		ddae	LY	5.26275						ddaa	LY	0.0509804		ddaf	HY	0		ddaf	LY	1.36471		epi	HY	1.24706		epi	LY	9.53725
ddae	HY	1.65882		ddae	LY	5.70196						ddaa	LY	0.101961		ddaf	HY	0.0235294		ddaf	LY	1.22745		epi	HY	1.26797		epi	LY	6.23399
				ddae	LY	4.36863						ddaa	LY	0.294118						ddaf	LY	0.419608						epi	LY	8.32026
mean		1.92601				5.10711				0.0232026				0.131127				0.0679739				0.555882				0.96671				6.42712
SD		0.548669				0.988843				0.0399384				0.17838				0.135545				0.495482				0.430407				1.60651
n		15				16				12				16				15				16				15				16

## Sheet: fig7-S
tissue	condition	% area		tissue	condition	% area		tissue	condition	% area		tissue	condition	% area		tissue	condition	% area		tissue	condition	% area		tissue	condition	% area		tissue	condition	% area
ddaE	HY	9.64		ddaE	LY	6.92		ddaA	HY	4.34		ddaA	LY	8.8		ddaF	HY	6.94		ddaF	LY	4.78		epi	HY	38.1967		epi	LY	33.4067
ddaE	HY	8.95		ddaE	LY	3.83		ddaA	HY	7.06		ddaA	LY	4.51		ddaF	HY	5.76		ddaF	LY	4.86		epi	HY	39.4967		epi	LY	41.7867
ddaE	HY	6.68		ddaE	LY	9.28		ddaA	HY	7.61		ddaA	LY	4.64		ddaF	HY	10.93		ddaF	LY	5.43		epi	HY	36.3767		epi	LY	42.6967
ddaE	HY	10.66		ddaE	LY	5.72		ddaA	HY	7.72		ddaA	LY	5.04		ddaF	HY	5.14		ddaF	LY	3.97		epi	HY	43.8067		epi	LY	43.37
ddaE	HY	11.63		ddaE	LY	3.66		ddaA	HY	8.02		ddaA	LY	6.18		ddaF	HY	6.65		ddaF	LY	6.09		epi	HY	37.8333		epi	LY	45.7033
ddaE	HY	4.76		ddaE	LY	4.31		ddaA	HY	9.54		ddaA	LY	6.2		ddaF	HY	9.92		ddaF	LY	4.1		epi	HY	47.7233		epi	LY	41.6567
ddaE	HY	7.26		ddaE	LY	2.56		ddaA	HY	8.81		ddaA	LY	9.32		ddaF	HY	10.82		ddaF	LY	5.94		epi	HY	36.9833		epi	LY	34.7433
ddaE	HY	8.9		ddaE	LY	5.29		ddaA	HY	8.04		ddaA	LY	4.71		ddaF	HY	11.21		ddaF	LY	4.15		epi	HY	36.5067		epi	LY	30.13
ddaE	HY	8.51		ddaE	LY	6.36		ddaA	HY	10.16		ddaA	LY	5.49		ddaF	HY	8.01		ddaF	LY	7.41		epi	HY	42.14		epi	LY	43.93
ddaE	HY	5.57		ddaE	LY	7.25						ddaA	LY	6.76		ddaF	HY	8.81		ddaF	LY	5.46		epi	HY	43.6233		epi	LY	38.8867
ddaE	HY	12.25		ddaE	LY	5.85						ddaA	LY	8.36		ddaF	HY	6.69		ddaF	LY	8.73		epi	HY	44.3367		epi	LY	39.7667
ddaE	HY	5.82		ddaE	LY	6.11						ddaA	LY	8.48						ddaF	LY	7.18		epi	HY	44.5733		epi	LY	42.11
ddaE	HY	9.6		ddaE	LY	5.91						ddaA	LY	5.54						ddaF	LY	4.5		epi	HY	40.3933		epi	LY	43.58
ddaE	HY	11.2		ddaE	LY	4.91																		epi	HY	42.2667		epi	LY	40.0733
ddaE	HY	7.42																						epi	HY	38.8267
ddaE	HY	9.11																						epi	HY	33.8233
ddaE	HY	13.01																						epi	HY	38.6667
																								epi	HY	41.9367
mean		8.88059				5.56857				7.92222				6.46385				8.26182				5.58462				40.4172				40.1314
SD		2.40713				1.69566				1.66398				1.72149				2.19748				1.45516				3.60896				4.46685
n		17				14				9				13				11				13				18				14

## Sheet: fig7-T
tissue	condition	% area		tissue	condition	% area		tissue	condition	% area		tissue	condition	% area		tissue	condition	% area		tissue	condition	% area		tissue	condition	% area		tissue	condition	% area
ddaA	LY	11.39		ddaF	LY	22.79		ddaE	LY	5.87		epi	LY	111.637		ddaA	HY	7.12		ddaF	HY	5.7		ddaE	HY	6.14		epi	HY	28.91
ddaA	LY	16.52		ddaF	LY	15.06		ddaE	LY	12.55		epi	LY	117.82		ddaA	HY	4.28		ddaF	HY	1.86		ddaE	HY	6.67		epi	HY	30.8467
ddaA	LY	9.29		ddaF	LY	14.67		ddaE	LY	20.25		epi	LY	117.583		ddaA	HY	3.96		ddaF	HY	3.47		ddaE	HY	4.96		epi	HY	32.3567
ddaA	LY	9.04		ddaF	LY	6.09		ddaE	LY	7.11		epi	LY	112.877		ddaA	HY	1.79		ddaF	HY	4.69		ddaE	HY	2.75		epi	HY	36.7933
ddaA	LY	4.82		ddaF	LY	10.44		ddaE	LY	4.78		epi	LY	103.57		ddaA	HY	3.92		ddaF	HY	3.4		ddaE	HY	4.08		epi	HY	34.2167
ddaA	LY	1.83		ddaF	LY	3.82		ddaE	LY	5.2		epi	LY	79.1733		ddaA	HY	3.52		ddaF	HY	2.1		ddaE	HY	4.34		epi	HY	31.57
ddaA	LY	4.69		ddaF	LY	6.06		ddaE	LY	4.15		epi	LY	79.5067		ddaA	HY	4.37		ddaF	HY	3.53		ddaE	HY	1.65		epi	HY	31.07
ddaA	LY	8.04		ddaF	LY	2.18		ddaE	LY	5.32		epi	LY	81.5833		ddaA	HY	1.95		ddaF	HY	2.42		ddaE	HY	4.31		epi	HY	31.9033
ddaA	LY	11.65		ddaF	LY	11.2		ddaE	LY	4.5		epi	LY	91.6367		ddaA	HY	8.05		ddaF	HY	3.26		ddaE	HY	3.43		epi	HY	28.0467
ddaA	LY	19.49		ddaF	LY	7.2		ddaE	LY	3.52		epi	LY	112.64		ddaA	HY	6.15		ddaF	HY	6.14		ddaE	HY	4.18		epi	HY	27.8367
ddaA	LY	17.84		ddaF	LY	13.28		ddaE	LY	3.16		epi	LY	107.503		ddaA	HY	5.31		ddaF	HY	2.92		ddaE	HY	4.54		epi	HY	27.3167
ddaA	LY	8.06		ddaF	LY	7.18		ddaE	LY	6.36		epi	LY	97.97		ddaA	HY	4.56		ddaF	HY	3.72		ddaE	HY	2.85		epi	HY	34.0033
ddaA	LY	7.86		ddaF	LY	5.7		ddaE	LY	6.21		epi	LY	85.5333		ddaA	HY	6.83		ddaF	HY	3.23		ddaE	HY	4.07		epi	HY	31.8233
ddaA	LY	3.48		ddaF	LY	6.48		ddaE	LY	4.97		epi	LY	87.04						ddaF	HY	3.28		ddaE	HY	5.11		epi	HY	32.48
ddaA	LY	8.92		ddaF	LY	7.1		ddaE	LY	1.9		epi	LY	75.1167						ddaF	HY	7.01		ddaE	HY	4.93		epi	HY	39.9933
ddaA	LY	7.46		ddaF	LY	5.29		ddaE	LY	2.57		epi	LY	74.3033						ddaF	HY	5.48		ddaE	HY	4.26		epi	HY	36.5233
				ddaF	LY	7.41		ddaE	LY	2.5		epi	LY	96.3867						ddaF	HY	8.05		ddaE	HY	5.78		epi	HY	37.1333
								ddaE	LY	3.61		epi	LY	72.25						ddaF	HY	4.63		ddaE	HY	3.66		epi	HY	39.1033
								ddaE	LY	3.81		epi	LY	115.327										ddaE	HY	3.08		epi	HY	32.7
mean		9.39875				8.93824				5.70211				95.7609				4.75462				4.16056				4.25211				32.8751
SD		5.02277				5.11343				4.22016				16.2567				1.89155				1.7147				1.22467				3.69856
n		16				17				17				17				13				18				19				19
