# Supplementary material for: Low FoxO expression in Drosophila somatosensory neurons protects dendrite growth under nutrient restriction
Source: eLife. 2020 May 19;9:e53351. doi: 10.7554/eLife.53351 (PMC7308081; doi:10.7554/eLife.53351)
Supplement: Supplementary file 1. [file elife-53351-supp1.xlsx]

## Sheet: Sheet1
Reagent type (species) or resource	Designation	Source or reference	identifiers	Additional information
Genetic reagent (Drosophila melanogaster)	Nrg-GFP	Bloomington Drosophila Stock Center	RRID: BDSC_6844	NrgG00305
Genetic reagent (Drosophila melanogaster)	Foxo-GFP	Bloomington Drosophila Stock Center	RRID: BDSC_38644	foxo-GFP.FLAGVK00037
Genetic reagent (Drosophila melanogaster)	Mitf-GFPnls	(Zhang et al., 2015)	NA	Mitf2.2-nGFP
Genetic reagent (Drosophila melanogaster)	mCherry-Atg8a	(Hegedus et al., 2016)	NA	3xmCherry-Atg8a4-2M
Genetic reagent (Drosophila melanogaster)	Lamp-mCherry	(Hegedus et al., 2016)	NA	Lamp-3xmCherry1-8M
Genetic reagent (Drosophila melanogaster)	nsyb-tdGFP	(Poe et al., 2019)	NA	R57C10-tdGFPVK00037
Genetic reagent (Drosophila melanogaster)	ppk-CD4-tdGFP	(Han et al., 2011)	RRID: BDSC_35842	ppk-CD4-tdGFP1b
Genetic reagent (Drosophila melanogaster)	R10D05-CD4-tdTom	(Poe et al., 2017)	NA	R10D05-CD4-tdTom2A
Genetic reagent (Drosophila melanogaster)	NompC-LexA::p65	Bloomington Drosophila Stock Center	RRID: BDSC_52240	NompC-LexA::p65VK00018
Genetic reagent (Drosophila melanogaster)	LexAop-CD4-tdTom	(Poe et al., 2017)	RRID: BDSC_77138	LexAop-CD4-tdTom4
Genetic reagent (Drosophila melanogaster)	R16D01-Gal4	Bloomington Drosophila Stock Center	RRID: BDSC_48722	R16D01-Gal4attP2
Genetic reagent (Drosophila melanogaster)	R38F11-Gal4	Bloomington Drosophila Stock Center	RRID: BDSC_50014	R38F11-Gal4attP2
Genetic reagent (Drosophila melanogaster)	RabX4-Gal4	Bloomington Drosophila Stock Center	RRID: BDSC_51602	RabX4-Gal4VK00033
Genetic reagent (Drosophila melanogaster)	ppk-Gal4	(Han et al., 2012)	NA	ppk-Gal41a
Genetic reagent (Drosophila melanogaster)	UAS-CD4-tdGFP	(Han et al., 2011)	RRID: BDSC_35839	UAS-CD4-tdGFP8M2
Genetic reagent (Drosophila melanogaster)	UAS-CD4-tdTom	(Han et al., 2011)	RRID: BDSC_35841	UAS-CD4-tdTom7M1
Genetic reagent (Drosophila melanogaster)	foxoMI00786	Bloomington Drosophila Stock Center	RRID: BDSC_32699
Genetic reagent (Drosophila melanogaster)	foxo-Gal4MI00786	This study	NA
Genetic reagent (Drosophila melanogaster)	UAS-InR-RNAi	Bloomington Drosophila Stock Center	RRID: BDSC_51518	TRiP.HMS03166attP40
Genetic reagent (Drosophila melanogaster)	UAS-InR-DN	Bloomington Drosophila Stock Center	RRID: BDSC_8253	UAS-InRK1409A
Genetic reagent (Drosophila melanogaster)	UAS-Tor-RNAi	Bloomington Drosophila Stock Center	RRID: BDSC_34639	TRiP.HMS01114attP2
Genetic reagent (Drosophila melanogaster)	UAS-Tor-DN	Bloomington Drosophila Stock Center	RRID: BDSC_7013	UAS-TorTED
Genetic reagent (Drosophila melanogaster)	UAS-foxo-RNAi	Bloomington Drosophila Stock Center	RRID: BDSC_32427	TRiP.HMS00422attP2
Genetic reagent (Drosophila melanogaster)	UAS-foxo-GFP	Bloomington Drosophila Stock Center	RRID: BDSC_44214	UASp-foxo.GFP2
Genetic reagent (Drosophila melanogaster)	UAS-Atg8a-RNAi	Bloomington Drosophila Stock Center	RRID: BDSC_58309	TRiP.HMJ22416attP40
Genetic reagent (Drosophila melanogaster)	UAS-sesn-RNAi	Bloomington Drosophila Stock Center	RRID: BDSC_64027	TRiP.HMS05363attP40
Genetic reagent (Drosophila melanogaster)	UAS-crc-RNAi	Bloomington Drosophila Stock Center	RRID: BDSC_80388	TRiP.HMC06624attP40
Genetic reagent (Drosophila melanogaster)	UAS-Rheb RNAi	Bloomington Drosophila Stock Center	RRID: BDSC_33966	TRiP.HMS00923attP2
Genetic reagent (Drosophila melanogaster)	UAS-slif RNAi	Bloomington Drosophila Stock Center	RRID: BDSC_52655	slifUY681
Genetic reagent (Drosophila melanogaster)	UAS-GFP-mCherry-Atg8a	Bloomington Drosophila Stock Center	RRID: BDSC_37749	UASp-GFP-mCherry-Atg8a2
Genetic reagent (Drosophila melanogaster)	UAS-foxo	(Sears and Broihier, 2016)	NA	UAS-foxof19-5
Genetic reagent (Drosophila melanogaster)	UAS-Mitf	(Zhang et al., 2015)	NA	UAS-Mitf96E
Genetic reagent (Drosophila melanogaster)	UAS-CD4-tdGFP	Bloomington Drosophila Stock Center	RRID: BDSC_35836	UAS-CD4-tdGFPVK00033
Genetic reagent (Drosophila melanogaster)	UAS-CD4-tdTom	Bloomington Drosophila Stock Center	RRID: BDSC_35841	UAS-CD4-tdTom7M1
Genetic reagent (Drosophila melanogaster)	UAS- mIFP-2A-HO1	(Poe et al., 2017)	RRID: BDSC_64181	UAS-mIFP-T2A-HO1VK00005
Genetic reagent (Drosophila melanogaster)	Sirt2 null mutant	Bloomington Drosophila Stock Center	RRID: BDSC_8839	Sirt25B-2-35
Genetic reagent (Drosophila melanogaster)	foxoΔ94	Bloomington Drosophila Stock Center	RRID: BDSC_42220
Genetic reagent (Drosophila melanogaster)	Gal419-12	(Rumpf et al., 2011)	NA
Genetic reagent (Drosophila melanogaster)	repo-Gal80	(Awasaki et al., 2008)	NA
Antibody	Rabbit anti-pRpS6 polyclonal antibody	(Kim et al., 2017)	NA	1:400 dilution
Antibody	Rabbit anti-FoxO polyclonal antibody	(Slaidina et al., 2009)	NA	1:500 dilution
Antibody	Donkey Anti-Rabbit IgG (H+L) AF488	Jackson ImmunoResearch Laboratories	Cat #: 711-545-152; RRID: AB_2313584	1:200 dilution
software, algorithm	FIJI	https://fiji.sc/	RRID: SCR_002285
software, algorithm	R	https://www.r-project.org/	RRID: SCR_001905
chemical compound, drug	Agar	MoorAgar, Inc	Cat #: 41084	Gelidium
chemical compound, drug	Glucose	LD Carlson Company	Cat #: 1992	Dextrose-corn sugar
chemical compound, drug	Inactive yeast	VWR International, LLC	Cat #: IC90331280	Yeast (brewers), Powder
chemical compound, drug	Phosphoric Acid	VWR International, LLC	Cat #: JT0260-2
chemical compound, drug	Propionic Acid	Krackeler Scientific	Cat #: 45-P1386-1L
